1  
2  
3  
4  
5  
6  
7  
8  
9  
10  
11  
12  
13  
14  
15  
16  
17  
18  
19  
20  
21  
22  
23  
24  
25  
26  
27  
28  
29  
30

## Cortico-basal white matter alterations occurring in Parkinson's disease

Bethany. R. Isaacs <sup>1,2,#a,\*</sup>, Anne. C. Trutti <sup>1,3</sup>, Esther Pelzer <sup>4,5</sup>, Marc Tittgemeyer <sup>4,5</sup>, Yasin Temel <sup>2</sup>, Birte. U. Forstmann <sup>1</sup>, Max. C. Keuken <sup>1</sup>

1. Integrative Model-based Cognitive Neuroscience research unit, University of Amsterdam, Amsterdam, the Netherlands
2. Department of Neurosurgery, Maastricht University Medical Centre, Maastricht, The Netherlands
3. Cognitive Psychology, University of Leiden, Leiden, the Netherlands.
4. Translational Neurocircuitry, Max Planck Institute for Metabolism Research, Cologne, Germany
5. Department of Neurology, University Clinics, Cologne, Germany

\* Corresponding author

Email address: [broseisaacs@gmail.com](mailto:broseisaacs@gmail.com)

<sup>#a</sup> Current address: Maastricht University Medical Centre, Department of Experimental Neurosurgery, Room F1.144, P. Debyelaan 25, 6202 AZ Maastricht

## 31 **Abstract**

32           Magnetic resonance imaging studies typically use standard anatomical atlases for identification and  
33 analyses of (patho-)physiological effects on specific brain areas; these atlases often fail to incorporate  
34 neuroanatomical alterations that may occur with both age and disease. The present study utilizes Parkinson's  
35 disease and age-specific anatomical atlases of the subthalamic nucleus for diffusion tractography, assessing tracts  
36 that run between the subthalamic nucleus and *a-priori* defined cortical areas known to be affected by Parkinson's  
37 disease. The results show that the strength of white matter fiber tracts appear to remain structurally unaffected by  
38 disease. Contrary to that, Fractional Anisotropy values were shown to decrease in Parkinson's disease patients for  
39 connections between the subthalamic nucleus and the pars opercularis of the inferior frontal gyrus, anterior  
40 cingulate cortex, the dorsolateral prefrontal cortex and the pre-supplementary motor, collectively involved in  
41 preparatory motor control, decision making and task monitoring. While the biological underpinnings of fractional  
42 anisotropy alterations remain elusive, they may nonetheless be used as an index of Parkinson's disease. Moreover,  
43 we find that failing to account for structural changes occurring in the subthalamic nucleus with age and disease  
44 reduce the accuracy and influence the results of tractography, highlighting the importance of using appropriate  
45 atlases for tractography.

## 47 **Introduction**

48           The subthalamic nucleus (STN) is a small region located in the basal ganglia (BG) that is integral to a  
49 range of motor behaviors and cognitive functions [1]. Abnormal activity of the STN is implicated in a number of  
50 neurodegenerative and neurological disorders including Parkinson's disease (PD). Here, increased indirect  
51 pathway activity is thought to increase the inhibition of motor plans rather than reducing inhibitory control [2].  
52 Accordingly, the STN is a common neurosurgical target for deep brain stimulation (DBS) for PD patients who no  
53 longer appropriately respond to pharmacological interventions, where standard targeting is facilitated by the use  
54 of MRI and stereotaxic atlases [3].

55  
56           However, these atlases are often based on a normal population and fail to account for neuroanatomical  
57 variability occurring for a variety of reasons, including age and disease [4–9] It is widely acknowledged that the  
58 anatomy of the STN varies substantially across healthy individuals, with *in-vivo* size estimates ranging from

59 50mm<sup>3</sup> to 270mm<sup>3</sup> (See [10] and references therein). Additionally, age-related changes associated with the STN  
60 show the location in standard MNI space shifts in lateral direction in the elderly population [11–14] with additional  
61 alterations of STN volume and location occurring PD [15].

62

63 Moreover, the STN demonstrates a complex connectivity profile both within the BG and with the rest of  
64 the cortex [16–24]. With regards to PD, both the structural and functional connectivity of the STN has been shown  
65 to predict the future outcome and relative success of DBS treatment [25]. This is supported by electrophysiological  
66 and functional (f)MRI results which show that specific cortico-basal connections are functionally altered in PD  
67 [26–28]. Furthermore, the existing variability in the success of DBS suggests the presence of individual  
68 differences in the integrity of specific connections between the STN and different cortical regions.

69

70 DBS of the STN is however associated with a number of psychiatric side-effects, cognitive, and  
71 emotional disturbances [29,30]. One explanation for these side-effects relates to the somatotopic arrangement of  
72 functionally dissimilar cortical projections within the STN [31–34]. In DBS, the implanted electrode may directly  
73 stimulate, due to suboptimal placement, or spread current to functionally disparate sub-regions of the nucleus  
74 which in-turn interfere with the typical connectivity between the STN and limbic or cognitive cortical areas  
75 [35,36].

76

77 Given the neuroanatomical alterations that occur in the STN due to orthologic aging or PD, it is crucial  
78 to investigate whether additional group specific changes extend to their structural connectivity. The current paper  
79 first aims to investigate whether there are disease specific alterations in the connectivity of cortical areas to the  
80 subthalamic nucleus in PD patients by using group specific atlases of the STN, and second, to assess whether any  
81 connectivity measures may be correlated with disease progression. We chose six cortical areas based on their  
82 functional involvements in limbic, cognitive, and motor processes, known to be affected in PD [37–41]. Cortical  
83 areas consisted of the pars opercularis of the inferior frontal gyrus (Pop), the anterior cingulate cortex (ACC), the  
84 dorsolateral prefrontal cortex (DLPFC), primary motor cortex (M1), supplementary motor area (SMA), and pre-  
85 supplementary motor area (pre-SMA). Notably, the we use these results to highlight the importance of using  
86 group specific atlases for STN identification when ultra-high field (UHF) MRI is not available, given the scarcity  
87 of UHF MRI sites relative to the number of DBS centers [42–47].

88

## 89 **Materials and methods**

### 90 **Subjects**

91           Seventy PD patients and thirty-one age-matched healthy controls participated in the study (Table 1) (see  
92 [48] for more details on subject population). Patients were not required to discontinue their medication for the  
93 purposes of this study. The gender imbalance in the PD group was due to the fact that PD is 1.5 times more likely  
94 to occur in men than in women [49–51]. Disease related variables were obtained from PD patients, which include  
95 UPDRS III scores taken both on and off medication, duration of disease in years, and side of symptom onset (left  
96 or right), all obtained from an expert neurologist [52]. Disease progression, as a measure of severity, is calculated  
97 by dividing each patients UPDRS off III score by the duration of the disease in years [53]. Medication response  
98 is calculated by dividing the UPDRS off III score by the respective UPDRS on [54]. All healthy controls self-  
99 reported no history of psychiatric or neurological disease, and PD patients reported no other neurological  
100 complaints than PD. The study was approved by the ethical committee of the University Hospital of Cologne,  
101 Germany.

102

**Table 1: Descriptive statistics.**

|                                 | Parkinson's Disease | Healthy Control |
|---------------------------------|---------------------|-----------------|
| <b>Age (years)</b>              | 62.01(8.62)         | 61.94(10.21)    |
| <b>Gender</b>                   | 54m/16f             | 25m/6f          |
| <b>Disease Duration (years)</b> | 6.51(4.64)          | -               |
| <b>UPDRS III on</b>             | 14.46(7.03)         | -               |
| <b>UPDRS III off</b>            | 29.84(12.18)        | -               |
| <b>Symptom onset (side)</b>     | 33l/37r             | -               |

103

104 The mean (SD) demographic statistics for both the Parkinson's Disease and healthy control group. UPDRS:  
105 Unified Parkinson's Disease Rating Scale.

106

107

108

109

## 110 **MRI acquisition**

111 Whole-brain anatomical T1-weighted and diffusion-weighted images were acquired for each subject  
112 with a Siemens 3T Trio scanner (Erlangen, Germany). T1-weighted images were obtained using a 12-channel  
113 array head coil with the following parameters: field of view (MDEFT3D: TR = 1930 ms, TI = 650 ms, TE = 5.8 ms,  
114 128 sagittal slices, voxel size = 1 x 1 x 1.25 mm<sup>3</sup>, flip angle = 18°). dMRI images were obtained via a spin-echo EPI  
115 sequence with a 32-channel array head coil (spin echo EPI: TR = 11200 ms, TE = 87ms, 90 axial slices, voxel size  
116 = 1.7 mm isotropic, 60 directions isotropically distributed (b-value = 1000 s/mm<sup>2</sup>). Distortions due to eddy  
117 currents and head motion were corrected using FSL (Version 5.0; [www.fmrib.ox.ac.uk/fsl](http://www.fmrib.ox.ac.uk/fsl)) [55]. Additionally, to  
118 provide an anatomical reference for motion correction, seven images without diffusion weighting (b0 images)  
119 were acquired at the beginning and after each block per ten diffusion-weighted images. The diffusion-weighted  
120 images were then registered to these b0 images (see [48] for more details regarding the data acquisition).

121

## 122 **Registration**

### 123 **MRI**

124 All registration steps were conducted using both linear and nonlinear functions with FLIRT and FNIRT  
125 (as implemented in FSL version 5.0). All registrations were performed on skull stripped and brain extracted  
126 images. T1 weighted images were first linearly registered to the MNI152 T1 1mm brain template with a correlation  
127 ratio and 12 DOF. An additional nonlinear transform was applied using the FNIRT function with standard settings,  
128 including the previously obtained affine transformation matrix. Individual T1-weighted scans in native space were  
129 registered to the respective no-diffusion (b0) images with a mutual information cost function and 6 DOF. A  
130 standardized midline exclusion mask in MNI152 space was registered to each subjects b0 images through multiple  
131 transforms, by combining the transformation matrices outputted via previous registrations. The midline exclusion  
132 mask was visually checked and realigned with an additional registration if necessary. Each step during the  
133 registration process was visually assessed for misalignments by comparing several landmarks (ventricles, pons,  
134 corpus callosum, cortical surface).

135

### 136 **Cortical Atlases**

137 The six cortical areas were obtained from <http://www.rbmars.dds.nl/CBPatlases.htm>, created with  
138 tractography methods, based on both human and non-human primate neuroanatomy [56–58]. The separate cortical  
139 masks were extracted from MNI152 1mm space. The cortical atlases were thresholded at 25% to minimize the  
140 occurrence of over estimating the region during registration procedures, which were achieved with a nonlinear  
141 transform from MNI152 1mm to individual b0 space using the previously generated transformation matrices from  
142 the anatomical registrations, with a nearest neighbor interpolation and 12 DOF (see Figure 1).

143

#### 144 **Figure 1: Cortical Atlases**

145

<< figure here >>

146 Figure 1. Cortical atlases used for probabilistic tractography and the diffusion tensor models in MNI152 1mm  
147 space, which consist of the pars opercularis (POp), anterior cingulate cortex (ACC), dorsolateral prefrontal cortex  
148 (DLPFC), primary motor cortex (M1), presupplementary motor area (pre-SMA) and supplementary motor area  
149 (SMA).

150

#### 151 **STN Atlases**

152 Group specific PD and elderly probabilistic atlases of the STN were obtained for the respective groups  
153 from [59] (Figure 2) (see [https://www.nitrc.org/projects/atag\\_pd/](https://www.nitrc.org/projects/atag_pd/) for probabilistic atlases and ATAG data) and  
154 were transformed from MNI152 1mm space to individual b0 space using a nonlinear transform and thresholded  
155 by 25%. The non-zero voxel volume in mm<sup>3</sup> for each atlas was as follows: PD left = 77; PD right = 70.13; HC  
156 left = 164.75; HC right = 138.38 and for the center of gravity (CoG) in MNI152 1mm space: PD left x = -10.44,  
157 y = -13.04, z = -8.16; PD right x = 11.84, y = -13.18, z = -89; HC left x = -10.56, y = -13.87, z = -7.10; HC right  
158 x = 12.10, y = -12.97, z = -6.20.

159

#### 160 **Figure 2: STN Atlases**

161

<< figure here >>

162 Figure 2. STN atlas in MNI152 1mm space where the PD STN is in dark blue, and the HC in light blue.

163

#### 164 **Probabilistic Tractography**

165 Probabilistic tractography was run between *a priori* defined cortical areas and group specific STN's.  
166 Diffusion image preprocessing and analyses were achieved using FSL 5.0. The two most likely diffusion  
167 directions per voxel were estimated using the bedpostX function as implemented in the FDT toolbox with standard  
168 settings [60]. Subsequently, probabilistic tractography (probtrackX) was conducted to calculate continuous  
169 structural connections between the respective seed and target region(s). ProbrackX was run with standard settings  
170 (curvature threshold 0.2, 5000 samples, 0.5mm step length, 2000 steps) in each subjects' native diffusion space,  
171 separately for left and right hemispheres and aided by the inclusion of a midline exclusion mask.

172  
173 The term tract strength here is used to index a probability density function, quantifying the ratio of how  
174 many streamlines directly and continuously commence from a seed region and terminate at a target area. This  
175 density function is a commonly used measure for inferring the strength of structural white matter tracts [60–62].  
176 For more robust measurements, we created an average of each pair of seed-to-target and target-to-seed streamlines  
177 [63,64] To control for spurious tracking, the tracts were thresholded by 10, whereby any voxel containing less  
178 than 10 direct samples were excluded from further analyses [64].

179  
180 We calculated the axial diffusivity (AD), fractional anisotropy (FA), and mean diffusivity (MD) of the  
181 seed-to-target and target-to-seed paths derived from the tract strength probability density function approach  
182 mentioned in the above section. This was achieved by fitting a voxel wise diffusion tensor model with a weighted  
183 least squares regression to each subjects' diffusion image using the DTIFIT function from FDT. Each FDT path  
184 was thresholded so that only paths with at least 75 samples were included for further analysis to yield a  
185 conservative anatomical representation. Then each pair of corresponding paths were combined (seed-to-target and  
186 target-to-seed), binarized and averaged per hemisphere. From these normalized FDT paths we extracted the AD,  
187 FA, and MD values per tract, per subject.

188

## 189 **Statistical Methods**

190 All statistical analyses were conducted within a Bayesian framework (Table 2) using the BayesFactor  
191 toolbox [65] in R [66], interpreted in light of the assumptions proposed by [67] and adapted by [68]. To test  
192 whether there were any group differences in either tract strength or DTI derived metrics, we used Bayesian  
193 ANOVAs. For Bayesian ANOVAs, each BF reported in the output is a ratio of the model's predictive success  
194 relative to a null hypothesis, following a mixed effects JZS Bayesian framework [69,70]. Additionally, where

195 appropriate, we include a comparison between the most likely and the second most likely model, which indicates  
196 how much more likely the winning model is given the data compared to the second most likely model. Both  
197 subject and hemisphere were added as random factors, accounting for unequal sample sizes. All analysis included  
198 default prior scales, and where adjustments of multiplicity are required, prior probabilities of the model are  
199 automatically adapted.  
200

**Table 2. Bayes Factor Interpretation**

| <b>Bayes Factor</b>     | <b>Interpretation</b>       |
|-------------------------|-----------------------------|
| <b>&gt; 100</b>         | Decisive evidence for H1    |
| <b>30 – 100</b>         | Very strong evidence for H1 |
| <b>10 – 30</b>          | Strong evidence for H1      |
| <b>3 – 10</b>           | Substantial evidence for H1 |
| <b>1 – 3</b>            | Anecdotal evidence for H1   |
| <b>1</b>                | No evidence                 |
| <b>1 / 3 – 1</b>        | Anecdotal evidence for H0   |
| <b>1 / 10 - 1 / 3</b>   | Substantial evidence for H0 |
| <b>1 / 30 - 1 / 10</b>  | Strong evidence for H0      |
| <b>1 / 100 - 1 / 30</b> | Very strong evidence for H0 |
| <b>&lt; 1 / 100</b>     | Decisive evidence for H0    |

201

202 To test whether disease progression correlated with either tract strength or the DTI derived metrics, we  
203 conducted Bayesian correlation analyses in JASP [71]. Disease progression and medication response were used  
204 as separate indices of disease severity [72]. All Bayesian tests used a non-informative prior and a medium sized  
205 distribution (conjugate distributions on either side).  
206

206

## 207 **Open science**

208 All scripts used to analyse the data can be found at <https://osf.io/4uxxs/>  
209

209

## 210 **Results**

### 211 **Group differences between HC and PD**



## 212 Demographics

213 Two samples Bayesian t-tests were conducted to assess for differences in age and gender across groups.  
214 For age, the  $BF_{10}$  of 0.23 indicates moderate evidence in favour of the null hypothesis as does a  $BF_{10}$  of 0.24 for  
215 gender. Therefore, we can assume that there is no difference in gender or age between groups and these variables  
216 are not included as covariates for further analyses.

217

## 218 Motion Parameters

219 Additional Bayesian t-tests were conducted to test for differences across groups in each of the directional  
220 (x, y, z) translation and rotation parameters, which index how much the subject moves during the MRI. All results  
221 were in favour of the null hypothesis (rotation x:  $BF_{10} = 0.51$ , rotation y:  $BF_{10} = 0.33$ ,  $BF_{10} = 0.25$ , translation x:  
222  $BF_{10} = 0.40$ , translation y:  $BF_{10} = 0.34$ , translation z:  $BF_{10} = 0.49$ ). Accordingly, motion parameters are not  
223 included as a covariate in further analyses.

224

## 225 Tract Strengths

226 We first set out to test whether there were differences in tract strength between healthy control subjects  
227 and PD patients with a mixed effects ANOVA, incorporating subject and hemisphere as random factors (see  
228 Figure 3 and table 3). When using group specific atlases of the STN, the largest model incorporated a main effect  
229 of structure and group, without interaction ( $BF_{10} = 2.61e+175$ ), which is 191 times more likely than the model  
230 incorporating an interaction term ( $BF_{10} = 1.37e+173$ ). This provides decisive evidence for tract strengths varying  
231 with both group and structure, but without an interaction.

232

233 **Table 3. Tract strength descriptive statistics per tract, per group.**

|         | Mean (S.D)  |             |
|---------|-------------|-------------|
|         | HC          | PD          |
| ACC     | 0.28 (0.19) | 0.21 (0.17) |
| DLPFC   | 0.25 (0.18) | 0.20 (0.17) |
| MI      | 0.50 (0.14) | 0.43 (0.16) |
| Pre-SMA | 0.66 (0.08) | 0.56 (0.16) |

|     |            |             |             |
|-----|------------|-------------|-------------|
| 234 | <b>SMA</b> | 0.65 (0.09) | 0.58 (0.15) |
| 235 | <b>POp</b> | 0.44 (0.22) | 0.34 (0.21) |

236

### 237 **Figure 3: Tract Strengths**

238

<< figure here >>

239 Figure 3. Tract strengths collapsed across hemisphere per structure, with healthy control subjects in purple and  
240 PD patients in blue. Tracts are measured from 0 to 1, which is representative of the ratio of the total number of  
241 tracts reported between the STN and the given cortical structure. Each point within each element represents a  
242 single subject. The width of each element represents the smoothed density. The columns overlapping each bar  
243 (each beginning at zero) represent the central tendency, and the bands overlapping each element reflect the 95%  
244 highest density intervals.

245

### 246 **DTI metrics: group differences**

247 To test whether there were group differences in the white matter composition, we extracted the AD, FA,  
248 and MD values of the six different tracts. Separate ANOVAs were run to assess AD, FA, and MD across groups  
249 (table 4). The model with the most evidence for difference in AD included differences across structure and group,  
250 but with no interaction ( $BF_{10} = 7.92e+148$ ). For MD, the strongest model incorporated only differences across  
251 structure ( $BF_{10} = 5.21e+127$ ).

252

253 When assessing FA, decisive evidence was found for the model incorporating an interaction between  
254 group and structure with a  $BF_{10}$  of  $4.57e+184$ , which is 4.2 times more likely than the second largest model which  
255 includes only main effects of structure and group ( $BF_{10} = 1.06e+184$ ). Post-hoc Bayesian t-tests revealed strong  
256 evidence for differences between groups for FA values between STN and POp with a  $BF_{10}$  of 18.53, with higher  
257 FA values for healthy controls than PD patients. Substantial evidence was found for FA values differing across  
258 groups between the STN and the ACC ( $BF_{10} = 3.05$ ), which are also higher in healthy controls than PD patients.  
259 Decisive evidence was found for the DLPFC ( $BF_{10} = 5.31e+10$ ) and pre-SMA ( $BF_{10} = 68.31$ ) connectivity  
260 profiles, again both with higher FA values for healthy controls than PD patients (Figure 4).

261

262

263 **Table 4: Diffusion Tensor Imaging (DTI) descriptive statistics of axial diffusivity, fractional anisotropy and**  
 264 **mean diffusivity per tract, per group**

|         | Mean (S.D)              |                        |                        |                        |                        |                        |
|---------|-------------------------|------------------------|------------------------|------------------------|------------------------|------------------------|
|         | AD                      |                        | FA                     |                        | MD                     |                        |
|         | HC                      | PD                     | HC                     | PD                     | HC                     | PD                     |
| ACC     | 1.21e-03<br>(5.21e-05)  | 1.18e-03<br>(4.46e-05) | 4.03e-01<br>(2.43e-02) | 3.94e-01<br>(2.85e-02) | 8.30e-04<br>(5.12e-05) | 8.22e-04<br>(5.14e-05) |
| DLPFC   | 1.188e-03<br>(4.81e-05) | 1.18e-03<br>(5.47e-05) | 3.67e-01<br>(2.20e-02) | 3.38e-01<br>(2.25e-02) | 8.55e-04<br>(4.45e-05) | 8.74e-04<br>(5.55e-05) |
| M1      | 1.28e-03<br>(7.82e-05)  | 1.25e-03<br>(7.54e-05) | 0.41<br>(0.4e-01)      | 4.09e-01<br>(3.99e-02) | 8.91e-04<br>(8.62e-05) | 8.91e-04<br>(8.65e-05) |
| Pre-SMA | 1.17e-03<br>(5.01e-05)  | 1.16e-03<br>(5.02e-05) | 4.01e-01<br>(2.30e-02) | 3.86e-01<br>(2.58e-02) | 8.23e-04<br>(5.34e-05) | 8.27e-04<br>(5.34e-05) |
| SMA     | 1.26e-03<br>(6.74e-05)  | 1.27e-03<br>(8.35e-05) | 0.39<br>(0.26e-01)     | 3.77e-01<br>(3.23e-02) | 9.16e-04<br>(6.95e-05) | 9.27e-04<br>(9.03e-05) |
| POp     | 1.25e-03<br>(6.74e-05)  | 1.31e-03<br>(6.06e-05) | 0.35<br>(0.2e-01)      | 3.50e-01<br>(2.27e-02) | 9.41e-04<br>(6.26e-05) | 9.37e-04<br>(5.58e-05) |

283 **Figure 4: Fractional anisotropy pathways**

284 << figure here >>

285 Figure 4. Averaged FA tracts per group running between the STN to the POp, ACC DLPFC, and pre-SMA, with  
 286 PD tracts in dark blue and healthy control tracts in light blue. In all tracts, the FA was lower for PD compared to  
 287 healthy controls.

## 289 Correlations

290 Bayesian paired correlations with a Pearson's Rho correlation coefficient was conducted to assess  
 291 whether for each PD patient, disease progression or medication response correlated with either their tract strength  
 292 or respective FA measures [71]. Additionally, because the motor related symptoms of PD often begin and  
 293 continue to exhibit asymmetrically, the side in which symptom onset was first identified (i.e., left or right side of  
 294 the body) was counterbalanced across hemisphere [73–75]. Symptom onset initiating on the left side of the body  
 295 was paired with tract strength or FA values arising from the right hemisphere and vice versa for the left hemisphere  
 296 (contralateral), and a separate correlation test was conducted for those tracts that occur in the hemisphere on the

297 same side as symptom onset (ipsilateral). This was done in order to control for the lateralization effects of both  
298 symptom presentation and brain connectivity and to test whether tract strengths can act as an index of symptom  
299 severity.

300

## 301 **Disease progression with tract strength**

302 All results reported substantial evidence for no correlation between tract strengths and disease  
303 progression (table 5).

304

305 **Table 5: Correlation between disease progression and tract strength**

306

| Tract   | Contralateral Hemisphere |                  | Ipsilateral Hemisphere |                  |
|---------|--------------------------|------------------|------------------------|------------------|
|         | Correlation              | BF <sub>10</sub> | Correlation            | BF <sub>10</sub> |
| ACC     | - 0.071                  | 0.18             | - 0.040                | 0.16             |
| DLPFC   | - 0.206                  | 0.15             | - 0.050                | 0.17             |
| MI      | 0.197                    | 0.20             | - 0.072                | 0.18             |
| Pre-SMA | 0.002                    | 0.15             | - 0.011                | 0.15             |
| SMA     | 0.010                    | 0.14             | - 0.040                | 0.16             |
| Pop     | 0.074                    | 0.18             | 0.145                  | 0.30             |

307

## 308 **Medication response with tract strength**

309 All results reported substantial evidence for no correlation between tract strengths and medication  
310 response (table 6).

311

312 **Table 6: Correlation between medication response and tract strength**

313

| Tract | Contralateral Hemisphere |                  | Ipsilateral Hemisphere |                  |
|-------|--------------------------|------------------|------------------------|------------------|
|       | Correlation              | BF <sub>10</sub> | Correlation            | BF <sub>10</sub> |
| ACC   | - 0.206                  | 0.63             | - 0.050                | 0.15             |

|                |         |      |         |      |
|----------------|---------|------|---------|------|
| <b>DLPFC</b>   | - 0.102 | 0.20 | - 0.090 | 0.20 |
| <b>M1</b>      | - 0.144 | 0.30 | 0.105   | 0.22 |
| <b>Pre-SMA</b> | 0.109   | 0.21 | 0.152   | 0.31 |
| <b>SMA</b>     | 0.037   | 0.16 | 0.062   | 0.17 |
| <b>POp</b>     | 0.003   | 0.15 | - 0.026 | 0.14 |

314

## 315 **Disease progression with FA**

316 The only FA path to show strong evidence of a correlation with disease progression was the DLPFC  
 317 ipsilateral score ( $r = 0.364$ ,  $BF_{10} = 16.50$ ), where side of symptom onset and hemisphere were the same. All other  
 318 results reported either anecdotal or substantial evidence for no correlation between FA and disease progression  
 319 (table 7).

320

321 **Table 7: Correlation between disease progression and fractional anisotropy**

322

| <b>Tract</b>   | <b>Contralateral Hemisphere</b> |           | <b>Ipsilateral Hemisphere</b> |           |
|----------------|---------------------------------|-----------|-------------------------------|-----------|
|                | <b>Correlation</b>              | <b>BF</b> | <b>Correlation</b>            | <b>BF</b> |
| <b>ACC</b>     | 0.141                           | 0.28      | 0.214                         | 0.71      |
| <b>DLPFC</b>   | 0.204                           | 0.61      | 0.364                         | 16.50     |
| <b>M1</b>      | - 0.027                         | 0.14      | - 0.009                       | 0.15      |
| <b>Pre-SMA</b> | 0.111                           | 0.23      | 0.09                          | 0.18      |
| <b>SMA</b>     | - 0.026                         | 0.14      | -0.003                        | 0.15      |
| <b>POp</b>     | 0.161                           | 0.36      | 0.106                         | 0.22      |

323

## 324 **Medication response with FA**

325 All results reported substantial evidence for no correlation between FA and medication response (table  
 326 8).

327

328 **Table 8: Correlation between medication response and fractional anisotropy**

329

| Tract   | Contralateral Hemisphere |      | Ipsilateral Hemisphere |      |
|---------|--------------------------|------|------------------------|------|
|         | Correlation              | BF   | Correlation            | BF   |
| ACC     | 0.125                    | 0.25 | 0.030                  | 0.14 |
| DLPFC   | 0.100                    | 0.21 | 0.018                  | 0.14 |
| MI      | 0.037                    | 0.16 | 0.084                  | 0.19 |
| Pre-SMA | 0.017                    | 0.24 | 0.105                  | 0.22 |
| SMA     | 0.014                    | 0.15 | 0.041                  | 0.16 |
| POp     | 0.055                    | 0.17 | - 0.042                | 0.16 |

330

## 331 Discussion

332

333

334

335

### 336 PD Disease specific alterations

337

338

339

340

341

342

343

344

345

346

347

348

The current study assessed the strength and microstructural changes occurring in predefined connectivity profiles between the STN and motor, limbic, and cognitive related cortical areas between PD patients and healthy elderly age-matched controls using group specific atlases of the STN.

For all six cortical areas, the tract strength was lower for the PD group. Moreover, none of the tract strengths between the STN and the cortical areas correlated with measures of disease progression or medication response. It therefore appears unlikely that the strength of any of the measured tracts may be used as a biomarker for PD. However, the STN for both groups showed strongest structural connections to the motor cortices, which likely reflects the role of the STN in motor control.

Diffusion tensor models were applied to draw quantitative measurements of each white matter tract. For the original analysis, we found evidence for a reduction in FA for the STN to POp, ACC, DLPFC, and pre-SMA tracts in PD patients compared to healthy controls. The POp is situated anterior to the premotor cortex and has been implicated in motor inhibition [76] which is referred to as the ability to suspend a premeditated motor response to a stimulus or an ongoing response [77]. It has also been proposed that the POp is the origin of “stop signal” behaviors, whereby the inhibition of a motor response results from direct stimulation of the subthalamic

349 nucleus [78]. Moreover, the primary STN-ACC circuit functions to monitor behaviors that involve conflict and  
350 therefore task switching and changing decisions [79–81]. Given the symptomatic profile of PD patients, it seems  
351 plausible that the STN-POp and ACC connectivity profiles would be structurally and or functionally effected by  
352 the disease [82,83].

353

354 Relatedly, associated functions of STN-pre-SMA circuit also include response inhibition [84], action  
355 choices [85–87], task switching and internally generated movements [88,89], which are shown to be disrupted in  
356 PD. Assuming structure both shapes and constrains function [90–92], compromised white matter tracts indexed  
357 by increased diffusivity and reduced FA could result in abnormal functioning and lead to clinically overt behaviors  
358 [93]. A dysfunctional STN-pre-SMA circuit could result in parkinsonian symptoms including micrographia,  
359 dysarthria, bradykinesia and hypokinesia, all of which involve a lack appropriate action selection, timing, and  
360 irregular task switching [94–96]. A dysfunctional STN-DLPFC circuit could reflect impaired motor control, PD  
361 related cognitive decline, and affective complaints [97–99] as well as being linked to dopaminergic abnormalities  
362 [100]. However, while reduced FA in specific STN-cortical circuits could be utilized as a biomarker for PD, it is  
363 difficult to infer the exact biological mechanisms underlying alterations in diffusion metrics relative to disease.  
364 FA has been considered as a summary measure of white matter integrity, that is highly sensitive to microstructural  
365 changes, but less sensitive to the type of change [101–104], though theoretically, a reduction in FA could be  
366 driven by a singular or combination of altered AD, MD, or radial diffusivity.

367

368 Moreover, white matter consists not only of axons, but oligodendrocytes, astrocytes and microglia and  
369 therefore structural changes can affect any of these properties, each of which is associated with a different function  
370 [105,106]. Studies have shown that FA correlates with myelination which is associated with speed conduction,  
371 though this is dependent on the formation and remodeling of oligodendrocytes and differentiation of  
372 oligodendrocyte precursor cells (OCPs) whose function is to determine the production, length and thickness of  
373 internodes and therefore also likely to contribute to the FA signal [107–110]. Fewer studies have assessed  
374 diffusion parameters in relation to astrocytes, though their contribution to FA signals is likely to be significant  
375 given their large occupying volume within both grey and white matter [109,111].

376

377 Physiologically, a disruption or structural abnormality occurring anywhere along the axon, for example  
378 due to changes in myelination, impaired astrocyte propagation or suboptimal OCP proliferation and

379 differentiation, would impede the rate of conduction and transmission between structures and consequently result  
380 in functional impairments [112]. Additionally, more widespread changes in myelin and internode plasticity can  
381 be driven by region-specific mechanisms [113,114]. In the case of PD, local signals arising from dopaminergic  
382 cell loss with the substantia nigra, or the pathological hyperactivity of the STN could drive the observed structural  
383 changes in cortico-basal white matter connections. However, due to the complex timeline and microscopic spatial  
384 resolution of these neurochemical and anatomical changes, it is currently not possible to identify which process  
385 corresponds with in-vivo human dMRI based FA measures.

386

387 Further, diffusivity has been correlated with partial voluming effects arising from free-water [115]. Free-  
388 water reflects the presence of water molecules that are not restrained by cellular barriers and therefore do not  
389 show a preference for direction, which may be increased in the presence of cellular damage [116]. Thus, the  
390 presence of free-water may influence biases on diffusion metrics which can result in a reduction in FA and or an  
391 increase in MD [117,118]. For instance, free-water present in diffusion has been shown to reflect FA changes  
392 occurring in other PD affected areas such as the substantia nigra [119,120]. Additionally, the measure of tract  
393 strength was taken via a probability density function (PDF), which despite being shown as a robust assessment,  
394 remains controversial. Measurements indexing for instance, relative strength via dynamic causal models offer a  
395 viable alternative [121].

396

## 397 **Correlates of PD disease severity**

398 Overall, we found no evidence for any correlation between either tract strengths or FA values with  
399 disease progression or medication response. With one exception, we found a positive correlation for FA values  
400 within the STN-DLPFC connectivity profile increasing with disease progression when the side of symptom onset  
401 was matched with hemisphere. An increased FA indicating restricted diffusion along a single direction is not  
402 necessarily compatible with explanations of neurodegenerative processes when assuming a higher FA implies  
403 increased myelination and axonal density which usually decrease with disease progression. It may be possible that  
404 the increased FA is explained by an attempted compensatory, neuroplasticity mechanism and or functional  
405 reorganization rather than a direct neurodegenerative process [122,123], or a response to atypical dopaminergic  
406 modulation and levodopa intake [124–126]. Such an adaptive reorganization of structural and functional pathways  
407 would, however, occur long before the onset of clinical symptoms, which is not in line with the rather progressed



408 stage of the PD population within this study [73,75]. We therefore remain speculative as to the explanation of this  
409 result.

410

## 411 **Considerations**

412 The use of MRI poses several challenges when imaging small subcortical nuclei such as the STN [127].  
413 In the current study, the resolution of the anatomical and diffusion sequences was rather large when considering  
414 the size of the STN [128]. Imaging the STN is subject to partial voluming effects and blurring of the voxels near  
415 the borders of the nucleus, which may contain different tissue types and or fiber bundles of neighboring structures  
416 <sup>24,129</sup>. This is further complicated by probabilistic atlases being inherently larger than is often anatomically exact  
417 and require registration between template and native space. Such registration procedures employ simple scaling  
418 factors that can fail to optimally incorporate morphometric and densitometric variability between individuals  
419 [130] which can in turn affect the accuracy of subsequent analysis. We account for this by using group specific  
420 atlases, thresholding atlases, and incorporating both rigid and affine transformations during registration  
421 procedures. In the supplementary section we included a number of additional analysis to investigate the effects of  
422 atlas accuracy.

423

424 Manual segmentation of the both the STN and cortical areas for all individuals would be the golden  
425 standard, however, the data in the current study did not allow for manual parcellation of the STN or of structurally  
426 distinct cortical areas [131,132]. Relatedly, the visualization of the STN would benefit from the use of sub-  
427 millimeter resolution imaging with UHF MRI and/or susceptibility-based contrasts [13,133].

428

429 Lastly, we do not assess for gender differences. While sexual dimorphisms in PD have been reported  
430 [50,96,134,135], it remains controversial as to how sensitive standardized scores such as the UPDRS are at  
431 identifying gender differences [134,136]. In addition, we include a relatively small sample size with an unbalanced  
432 male to female ratio.

433

## 434 **Conclusions and future directions**

435 To conclude, the strength of white matter tracts within the hyper-direct pathway appear unaffected by  
436 the pathophysiology of PD. However, decreased FA values of the STN-POp, STN-DLPFC and STN-pre-SMA

437 tracts may be used as a biomarker for disease, though the exact biological mechanisms driving these disease  
438 specific alterations in FA remain elusive. Regardless, the differences we find are in the connections to cortical  
439 areas involved in preparatory motor control, task monitoring and decision making, rather than cortical areas  
440 governing motor output. Further, the results indicate that it is recommended to use an atlas that accounts for  
441 anatomical changes associated with PD rather than only age matched controls. See the supporting information for  
442 a control analysis to support the use of group specific atlases. Future work should focus on the use of higher field  
443 strengths, alternative tractography methods and harmonization of techniques used to investigate PD [137,138].  
444 Until then, we show that using atlases that are specific to your population can aid analysis where UHF MRI and  
445 or manual segmentations are not possible.

446

447 Tractography methods hold great promise for their contribution to identification of disease, differential  
448 diagnoses between subtypes of parkinsonian syndromes and the application of DBS [139,140]. Such applications  
449 require assessment of the biological foundations of diffusion metrics and neuroanatomical factors with specific  
450 subsets of disease scales used to evaluate presence and severity.

451

## 452 **References**

- 453 1. Parent, A. & Hazrati, L. N. Functional anatomy of the basal ganglia. II. The place of subthalamic  
454 nucleus and external pallidum in basal ganglia circuitry. *Brain Res. Brain Res. Rev.* **20**, 128–54 (1995).
- 455 2. Obeso, J. A. *et al.* Pathophysiology of the basal ganglia in Parkinson's disease. *Trends Neurosci.* **23**,  
456 (2000).
- 457 3. Perlmutter, J. S. & Mink, J. W. DEEP BRAIN STIMULATION. *Annu. Rev. Neurosci.* **29**, 229–257  
458 (2006).
- 459 4. Dickie, D. A. *et al.* Whole Brain Magnetic Resonance Image Atlases: A Systematic Review of Existing  
460 Atlases and Caveats for Use in Population Imaging. *Front. Neuroinform.* (2017).  
461 doi:10.3389/fninf.2017.00001
- 462 5. Evans. Brain templates and atlases. *Neuroimage* **62**, 911–922 (2012).
- 463 6. Lucerna, S., Salpietro, F. M., Alafaci, C. & Tomasello, F. in *In Vivo Atlas of Deep Brain Structures* 1–1  
464 (Springer Berlin Heidelberg, 2002). doi:10.1007/978-3-642-56381-2\_1
- 465 7. Nakano, N., Taneda, M., Watanabe, A. & Kato, A. Computed Three-Dimensional Atlas of Subthalamic  
466 Nucleus and Its Adjacent Structures for Deep Brain Stimulation in Parkinson's Disease. *ISRN Neurol.*

- 467 (2012). doi:10.5402/2012/592678
- 468 8. Richter, E. O., Hoque, T., Halliday, W., Lozano, A. M. & Saint-Cyr, J. A. Determining the position and  
469 size of the subthalamic nucleus based on magnetic resonance imaging results in patients with advanced  
470 Parkinson disease. *J. Neurosurg.* **100**, 541–546 (2004).
- 471 9. Xiao, Y. *et al.* Investigation of morphometric variability of subthalamic nucleus, red nucleus, and  
472 substantia nigra in advanced Parkinson’s disease patients using automatic segmentation and PCA-based  
473 analysis. *Hum. Brain Mapp.* (2014). doi:10.1002/hbm.22478
- 474 10. Zwirner, J. *et al.* Subthalamic nucleus volumes are highly consistent but decrease age-dependently—a  
475 combined magnetic resonance imaging and stereology approach in humans. *Hum. Brain Mapp.* (2017).  
476 doi:10.1002/hbm.23427
- 477 11. den Dunnen, W. F. A. & Staal, M. J. Anatomical alterations of the subthalamic nucleus in relation to  
478 age: A postmortem study. *Mov. Disord.* **20**, 893–898 (2005).
- 479 12. Alkemade, A. *et al.* Comparison of T2\*-weighted and QSM contrasts in Parkinson’s disease to visualize  
480 the STN with MRI. *PLoS One* (2017). doi:10.1371/journal.pone.0176130
- 481 13. Keuken, M. C. *et al.* Effects of aging on [Formula: see text], [Formula: see text], and QSM MRI values  
482 in the subcortex. *Brain Struct Funct* (2017). doi:10.1007/s00429-016-1352-4
- 483 14. Kitajima, M. *et al.* Human subthalamic nucleus: evaluation with high-resolution MR imaging at 3.0 T.  
484 *Neuroradiology* **50**, 675–681 (2008).
- 485 15. Pereira, J. L. B. *et al.* Lateralization of the subthalamic nucleus with age in Parkinson’s disease. *Basal*  
486 *Ganglia* (2016). doi:10.1016/j.baga.2016.01.003
- 487 16. Baudrexel, S. *et al.* Resting state fMRI reveals increased subthalamic nucleus-motor cortex connectivity  
488 in Parkinson’s disease. *Neuroimage* (2011). doi:10.1016/j.neuroimage.2011.01.017
- 489 17. Brunenberg, E. J. L. *et al.* Structural and resting state functional connectivity of the subthalamic  
490 nucleus: Identification of motor stn parts and the hyperdirect pathway. *PLoS One* (2012).  
491 doi:10.1371/journal.pone.0039061
- 492 18. Dyrby, T. B. *et al.* Validation of in vitro probabilistic tractography. *Neuroimage* **37**, 1267–1277 (2007).
- 493 19. Jahanshahi, M., Obeso, I., Rothwell, J. C. & Obeso, J. A. A fronto-striato-subthalamic-pallidal network  
494 for goal-directed and habitual inhibition. *Nature Reviews Neuroscience* **16**, 719–732 (2015).
- 495 20. Lambert, C. *et al.* Confirmation of functional zones within the human subthalamic nucleus: Patterns of  
496 connectivity and sub-parcellation using diffusion weighted imaging. *Neuroimage* **60**, 83–94 (2012).

- 497 21. Lenglet, C. *et al.* Comprehensive in vivo mapping of the human basal ganglia and thalamic connectome  
498 in individuals using 7T MRI. *PLoS One* (2012). doi:10.1371/journal.pone.0029153
- 499 22. Nambu, A. Seven problems on the basal ganglia. *Current Opinion in Neurobiology* (2008).  
500 doi:10.1016/j.conb.2008.11.001
- 501 23. Plantinga, B. R. *et al.* Individualized parcellation of the subthalamic nucleus in patients with  
502 Parkinson's disease with 7T MRI. *Neuroimage* (2016). doi:10.1016/j.neuroimage.2016.09.023
- 503 24. Plantinga, B. R. *et al.* Ultra-High Field MRI Post Mortem Structural Connectivity of the Human  
504 Subthalamic Nucleus, Substantia Nigra, and Globus Pallidus. *Front. Neuroanat.* (2016).  
505 doi:10.3389/fnana.2016.00066
- 506 25. Horn, A. *et al.* Connectivity Predicts deep brain stimulation outcome in Parkinson disease. *Ann. Neurol.*  
507 **82**, 67–78 (2017).
- 508 26. Litvak, V. *et al.* Resting oscillatory cortico-subthalamic connectivity in patients with Parkinson's  
509 disease. *Brain* **134**, 359–374 (2011).
- 510 27. Rowe, J. *et al.* Attention to action in Parkinson's disease: impaired effective connectivity among frontal  
511 cortical regions. *Brain* **125**, 276–89 (2002).
- 512 28. Wu, T. *et al.* Changes of functional connectivity of the motor network in the resting state in Parkinson's  
513 disease. *Neurosci. Lett.* **460**, 6–10 (2009).
- 514 29. Benabid, A. L., Chabardes, S., Mitrofanis, J. & Pollak, P. Deep brain stimulation of the subthalamic  
515 nucleus for the treatment of Parkinson's disease. *Lancet Neurol.* **8**, 67–81 (2009).
- 516 30. Wichmann, T. & DeLong, M. R. Deep Brain Stimulation for Neurologic and Neuropsychiatric  
517 Disorders. *Neuron* **52**, 197–204 (2006).
- 518 31. Joel, D. & Weiner, I. The connections of the primate subthalamic nucleus: Indirect pathways and the  
519 open-interconnected scheme of basal ganglia-thalamocortical circuitry. *Brain Research Reviews* (1997).  
520 doi:10.1016/S0165-0173(96)00018-5
- 521 32. Miyachi, S. *et al.* Somatotopically arranged inputs from putamen and subthalamic nucleus to primary  
522 motor cortex. *Neurosci. Res.* **56**, 300–308 (2006).
- 523 33. Nambu, A., Takada, M., Inase, M. & Tokuno, H. Dual somatotopical representations in the primate  
524 subthalamic nucleus: evidence for ordered but reversed body-map transformations from the primary  
525 motor cortex and the supplementary motor area. *J. Neurosci.* **16**, 2671–83 (1996).
- 526 34. Romanelli, P., Esposito, V., Schaal, D. W. & Heit, G. Somatotopy in the basal ganglia: experimental

- 527 and clinical evidence for segregated sensorimotor channels. *Brain Res. Rev.* **48**, 112–128 (2005).
- 528 35. Saint-Cyr, J. a *et al.* Localization of clinically effective stimulating electrodes in the human subthalamic  
529 nucleus on magnetic resonance imaging. *J Neurosurg* (2002). doi:10.3171/jns.2002.97.5.1152
- 530 36. Temel, Y., Blokland, A., Steinbusch, H. W. M. & Visser-Vandewalle, V. The functional role of the  
531 subthalamic nucleus in cognitive and limbic circuits. *Progress in Neurobiology* (2005).  
532 doi:10.1016/j.pneurobio.2005.09.005
- 533 37. Hu, Y. & Dolcos, S. Trait anxiety mediates the link between inferior frontal cortex volume and negative  
534 affective bias in healthy adults. *Soc. Cogn. Affect. Neurosci.* (2017). doi:10.1093/scan/nsx008
- 535 38. Kane, M. J. & Engle, R. W. The role of prefrontal cortex in working-memory capacity, executive  
536 attention, and general fluid intelligence: An individual-differences perspective. *Psychon. Bull. Rev.*  
537 (2002). doi:10.3758/BF03196323
- 538 39. Nambu, A., Tokuno, H. & Takada, M. Functional significance of the cortico-subthalamo-pallidal  
539 ‘hyperdirect’ pathway. *Neurosci. Res.* **43**, 111–7 (2002).
- 540 40. MacDonald, A. W., Cohen, J. D., Andrew Stenger, V. & Carter, C. S. Dissociating the role of the  
541 dorsolateral prefrontal and anterior cingulate cortex in cognitive control. *Science* (80-. ). (2000).  
542 doi:10.1126/science.288.5472.1835
- 543 41. Molnar-Szakacs, I., Iacoboni, M., Koski, L. & Mazziotta, J. C. Functional segregation within pars  
544 opercularis of the inferior frontal gyrus: Evidence from fMRI studies of imitation and action  
545 observation. *Cereb. Cortex* (2005). doi:10.1093/cercor/bhh199
- 546 42. Abosch, A., Yacoub, E., Ugurbil, K. & Harel, N. An assessment of current brain targets for deep brain  
547 stimulation surgery with susceptibility-weighted imaging at 7 tesla. *Neurosurgery* (2010).  
548 doi:10.1227/NEU.0b013e3181f74105
- 549 43. Beisteiner, R. *et al.* Clinical fMRI: Evidence for a 7T benefit over 3T. *Neuroimage* (2011).  
550 doi:10.1016/j.neuroimage.2011.05.010
- 551 44. Cho, Z.-H. Z. H. *et al.* Direct visualization of deep brain stimulation targets in Parkinson disease with  
552 the use of 7-tesla magnetic resonance imaging. *J. Neurosurg.* (2010). doi:10.3171/2010.3.JNS091385
- 553 45. Cho, Z. H. *et al.* New brain atlas-mapping the human brain in vivo with 7.0 T MRI and comparison with  
554 postmortem histology: Will these images change modern medicine? *Int. J. Imaging Syst. Technol.*  
555 (2008). doi:10.1002/ima.20143
- 556 46. Forstmann, B. U. *et al.* Cortico-subthalamic white matter tract strength predicts interindividual efficacy

- 557 in stopping a motor response. *Neuroimage* **60**, 370–375 (2012).
- 558 47. Hoffmann, A. L. *et al.* Characterizing geometrical accuracy in clinically optimised 7T and 3T magnetic  
559 resonance images for high-precision radiation treatment of brain tumours. *Phys. Imaging Radiat. Oncol.*  
560 **9**, 35–42 (2019).
- 561 48. Feis, D.-L., Pelzer, E. A., Timmermann, L. & Tittgemeyer, M. Classification of symptom-side  
562 predominance in idiopathic Parkinson’s disease. *npj Park. Dis.* (2015). doi:10.1038/npjparkd.2015.18
- 563 49. Marceglia, S. *et al.* Gender-related differences in the human subthalamic area: A local field potential  
564 study. *Eur. J. Neurosci.* (2006). doi:10.1111/j.1460-9568.2006.05208.x
- 565 50. Miller, I. N. & Cronin-Golomb, A. Gender differences in Parkinson’s disease: Clinical characteristics  
566 and cognition. *Movement Disorders* (2010). doi:10.1002/mds.23388
- 567 51. Moisan, F. *et al.* Parkinson disease male-to-female ratios increase with age: French nationwide study  
568 and meta-analysis. *J. Neurol. Neurosurg. Psychiatry* (2016). doi:10.1136/jnnp-2015-312283
- 569 52. Tomer, R., Levin, B. E. & Weiner, W. J. Side of onset of motor symptoms influences cognition in  
570 Parkinson’s disease. *Ann. Neurol.* (1993). doi:10.1002/ana.410340412
- 571 53. Baumann, C. R., Held, U., Valko, P. O., Wienecke, M. & Waldvogel, D. Body side and predominant  
572 motor features at the onset of Parkinson’s disease are linked to motor and nonmotor progression. *Mov.*  
573 *Disord.* (2014). doi:10.1002/mds.25650
- 574 54. Bordelon, Y. M. *et al.* Medication responsiveness of motor symptoms in a population-based study of  
575 parkinson disease. *Parkinsons. Dis.* (2011). doi:10.4061/2011/967839
- 576 55. Jenkinson, M., Beckmann, C. F., Behrens, T. E., Woolrich, M. W. & Smith, S. M. FSL 1. *Neuroimage.*  
577 (2012).
- 578 56. Neubert, F.-X., Mars, R. B., Thomas, A. G., Sallet, J. & Rushworth, M. F. S. Comparison of human  
579 ventral frontal cortex areas for cognitive control and language with areas in monkey frontal cortex.  
580 *Neuron* **81**, 700–13 (2014).
- 581 57. Sallet, J. *et al.* The Organization of Dorsal Frontal Cortex in Humans and Macaques. *J. Neurosci.* **33**,  
582 12255–12274 (2013).
- 583 58. Neubert, F.-X., Mars, R. B., Sallet, J. & Rushworth, M. F. S. Connectivity reveals relationship of brain  
584 areas for reward-guided learning and decision making in human and monkey frontal cortex. *Proc. Natl.*  
585 *Acad. Sci.* (2015). doi:10.1073/pnas.1410767112
- 586 59. Alkemade, A. *et al.* Comparison of T2\*-weighted and QSM contrasts in Parkinson’s disease to visualize

- 587 the STN with MRI. *PLoS One* **12**, e0176130 (2017).
- 588 60. Behrens, T. E. J., Berg, H. J., Jbabdi, S., Rushworth, M. F. S. & Woolrich, M. W. Probabilistic diffusion  
589 tractography with multiple fibre orientations: What can we gain? *Neuroimage* (2007).  
590 doi:10.1016/j.neuroimage.2006.09.018
- 591 61. Khalsa, S., Mayhew, S. D., Chechlacz, M., Bagary, M. & Bagshaw, A. P. The structural and functional  
592 connectivity of the posterior cingulate cortex: Comparison between deterministic and probabilistic  
593 tractography for the investigation of structure-function relationships. *NeuroImage* (2014).  
594 doi:10.1016/j.neuroimage.2013.12.022
- 595 62. van den Bos, W., Rodriguez, C. A., Schweitzer, J. B. & McClure, S. M. Connectivity Strength of  
596 Dissociable Striatal Tracts Predict Individual Differences in Temporal Discounting. *J. Neurosci.* (2014).  
597 doi:10.1523/jneurosci.4105-13.2014
- 598 63. Boekel, W., Forstmann, B. U. & Keuken, M. C. A test-retest reliability analysis of diffusion measures of  
599 white matter tracts relevant for cognitive control. *Psychophysiology* **54**, 24–33 (2017).
- 600 64. Forstmann, B. U. *et al.* Cortico-striatal connections predict control over speed and accuracy in  
601 perceptual decision making. *Proc. Natl. Acad. Sci. U. S. A.* **107**, 15916–20 (2010).
- 602 65. Morey, R. D. & Wagenmakers, E. J. Simple relation between Bayesian order-restricted and point-null  
603 hypothesis tests. *Stat. Probab. Lett.* (2014). doi:10.1016/j.spl.2014.05.010
- 604 66. R Development Core Team, . R: A Language and Environment for Statistical Computing. *R Found.*  
605 *Stat. Comput.* (2011). doi:10.1007/978-3-540-74686-7
- 606 67. Jeffreys, H. *The theory of probability*. (OUP, 1998).
- 607 68. Wetzels, R. *et al.* Statistical evidence in experimental psychology: An empirical comparison using 855 t  
608 tests. *Perspect. Psychol. Sci.* (2011). doi:10.1177/1745691611406923
- 609 69. Rouder, J. N., Morey, R. D., Speckman, P. L. & Province, J. M. Default Bayes factors for ANOVA  
610 designs. *J. Math. Psychol.* (2012). doi:10.1016/j.jmp.2012.08.001
- 611 70. Richard, A., Morey, D., Rouder, J. N., Jamil, T. & Morey, M. R. D. Package ‘ BayesFactor ’. (2015).
- 612 71. JASP Team. JASP. [*Computer software*] (2019).
- 613 72. Perlmutter, J. S. Assessment of parkinson disease manifestations. *Current Protocols in Neuroscience*  
614 (2009). doi:10.1002/0471142301.ns1001s49
- 615 73. Braak, H. *et al.* Stanley Fahn lecture 2005: The staging procedure for the inclusion body pathology  
616 associated with sporadic Parkinson’s disease reconsidered. *Movement Disorders* (2006).



- 617 doi:10.1002/mds.21065
- 618 74. Hilker, R. *et al.* Nonlinear progression of Parkinson disease as determined by serial positron emission  
619 tomographic imaging of striatal fluorodopa F 18 activity. *Arch. Neurol.* (2005).  
620 doi:10.1001/archneur.62.3.378
- 621 75. Sharott, A. *et al.* Activity Parameters of Subthalamic Nucleus Neurons Selectively Predict Motor  
622 Symptom Severity in Parkinson's Disease. *J. Neurosci.* (2014). doi:10.1523/JNEUROSCI.1803-13.2014
- 623 76. Curley, L. B. *et al.* Cortical morphology of the pars opercularis and its relationship to motor-inhibitory  
624 performance in a longitudinal, developing cohort. *Brain Struct. Funct.* (2018). doi:10.1007/s00429-017-  
625 1480-5
- 626 77. Aron, A. R., Robbins, T. W. & Poldrack, R. A. Inhibition and the right inferior frontal cortex: One  
627 decade on. *Trends in Cognitive Sciences* (2014). doi:10.1016/j.tics.2013.12.003
- 628 78. Chambers, C. D., Garavan, H. & Bellgrove, M. A. Insights into the neural basis of response inhibition  
629 from cognitive and clinical neuroscience. *Neuroscience and Biobehavioral Reviews* (2009).  
630 doi:10.1016/j.neubiorev.2008.08.016
- 631 79. Schroeder, U. Subthalamic nucleus stimulation affects striato-anterior cingulate cortex circuit in a  
632 response conflict task: a PET study. *Brain* (2002). doi:10.1093/brain/awf199
- 633 80. Botvinick, M. M. Conflict monitoring and decision making: Reconciling two perspectives on anterior  
634 cingulate function. *Cognitive, Affective and Behavioral Neuroscience* (2007).  
635 doi:10.3758/CABN.7.4.356
- 636 81. Bryden, D. W. *et al.* Single Neurons in Anterior Cingulate Cortex Signal the Need to Change Action  
637 During Performance of a Stop-change Task that Induces Response Competition. *Cereb. Cortex* (2018).  
638 doi:10.1093/cercor/bhy008
- 639 82. Kamagata, K. *et al.* Connectome analysis with diffusion MRI in idiopathic Parkinson's disease:  
640 Evaluation using multi-shell, multi-tissue, constrained spherical deconvolution. *NeuroImage Clin.*  
641 (2018). doi:10.1016/j.nicl.2017.11.007
- 642 83. Theilmann, R. J. *et al.* White-matter changes correlate with cognitive functioning in Parkinson's  
643 disease. *Front. Neurol.* (2013). doi:10.3389/fneur.2013.00037
- 644 84. King, A. V. *et al.* Microstructure of a three-way anatomical network predicts individual differences in  
645 response inhibition: A tractography study. *Neuroimage* (2012). doi:10.1016/j.neuroimage.2011.09.008
- 646 85. Boorman, E. D., O'Shea, J., Sebastian, C., Rushworth, M. F. S. & Johansen-Berg, H. Individual



- 647 Differences in White-Matter Microstructure Reflect Variation in Functional Connectivity during  
648 Choice. *Curr. Biol.* **17**, 1426–1431 (2007).
- 649 86. Johansen-Berg, H. Behavioural relevance of variation in white matter microstructure. *Curr. Opin.*  
650 *Neurol.* **1** (2010). doi:10.1097/WCO.0b013e32833b7631
- 651 87. Neubert, F.-X., Mars, R. B., Buch, E. R., Olivier, E. & Rushworth, M. F. S. Cortical and subcortical  
652 interactions during action reprogramming and their related white matter pathways. *Proc. Natl. Acad.*  
653 *Sci.* (2010). doi:10.1073/pnas.1000674107
- 654 88. Gowen, E. & Miall, R. C. Differentiation between external and internal cuing: An fMRI study  
655 comparing tracing with drawing. *Neuroimage* (2007). doi:10.1016/j.neuroimage.2007.03.005
- 656 89. Nachev, P., Kennard, C. & Husain, M. Functional role of the supplementary and pre-supplementary  
657 motor areas. *Nature Reviews Neuroscience* (2008). doi:10.1038/nrn2478
- 658 90. Hagmann, P. *et al.* White matter maturation reshapes structural connectivity in the late developing  
659 human brain. *Proc. Natl. Acad. Sci.* (2010). doi:10.1073/pnas.1009073107
- 660 91. Honey, C. J. *et al.* Predicting human resting-state functional connectivity from structural connectivity.  
661 *Proc. Natl. Acad. Sci.* (2009). doi:10.1073/pnas.0811168106
- 662 92. Honey, C. J., Thivierge, J. P. & Sporns, O. Can structure predict function in the human brain?  
663 *NeuroImage* (2010). doi:10.1016/j.neuroimage.2010.01.071
- 664 93. Tinaz, S., Lauro, P. M., Ghosh, P., Lungu, C. & Horovitz, S. G. Changes in functional organization and  
665 white matter integrity in the connectome in Parkinson's disease. *NeuroImage Clin.* (2017).  
666 doi:10.1016/j.nicl.2016.12.019
- 667 94. Artieda, J., Pastor, M. A., Lacruz, F. & Obeso, J. A. Temporal discrimination is abnormal in parkinson's  
668 disease. *Brain* (1992). doi:10.1093/brain/115.1.199
- 669 95. Frank, M. J., Samanta, J., Moustafa, A. A. & Sherman, S. J. Hold your horses: Impulsivity, deep brain  
670 stimulation, and medication in Parkinsonism. *Science* (80-. ). (2007). doi:10.1126/science.1146157
- 671 96. Wylie, S. A., Ridderinkhof, K. R., Bashore, T. R. & Van Den Wildenberg, W. P. M. The effect of  
672 Parkinson's disease on the dynamics of on-line and proactive cognitive control during action selection.  
673 *J. Cogn. Neurosci.* (2010). doi:10.1162/jocn.2009.21326
- 674 97. Chaudhuri, K. R. & Schapira, A. H. Non-motor symptoms of Parkinson's disease: dopaminergic  
675 pathophysiology and treatment. *The Lancet Neurology* (2009). doi:10.1016/S1474-4422(09)70068-7
- 676 98. Forsaa, E. B. *et al.* A 12-year population-based study of psychosis in Parkinson disease. *Arch. Neurol.*

- 677 (2010). doi:10.1001/archneurol.2010.166
- 678 99. Santangelo, G. *et al.* A neuropsychological longitudinal study in Parkinson's patients with and without  
679 hallucinations. *Mov. Disord.* **22**, 2418–2425 (2007).
- 680 100. Markett, S. *et al.* Variation on the dopamine D2 receptor gene (DRD2) is associated with basal ganglia-  
681 to-frontal structural connectivity. *Neuroimage* (2017). doi:10.1016/j.neuroimage.2017.04.005
- 682 101. Jones, D. K., Knösche, T. R. & Turner, R. White matter integrity, fiber count, and other fallacies: The  
683 do's and don'ts of diffusion MRI. *NeuroImage* (2013). doi:10.1016/j.neuroimage.2012.06.081
- 684 102. Kim, H. J. *et al.* Alterations of mean diffusivity in brain white matter and deep gray matter in  
685 Parkinson's disease. *Neurosci. Lett.* (2013). doi:10.1016/j.neulet.2013.06.050
- 686 103. Roberts, R. E., Anderson, E. J. & Husain, M. White matter microstructure and cognitive function.  
687 *Neuroscientist* **19**, 8–15 (2013).
- 688 104. Ziegler, E. *et al.* Mapping track density changes in nigrostriatal and extranigral pathways in Parkinson's  
689 disease. *Neuroimage* (2014). doi:10.1016/j.neuroimage.2014.06.033
- 690 105. Rosenberg, S. S. *et al.* Neurite outgrowth inhibitor Nogo-A establishes spatial segregation and extent of  
691 oligodendrocyte myelination. *Proc. Natl. Acad. Sci.* (2011). doi:10.1073/pnas.1113540109
- 692 106. Chong, S. Y. C. *et al.* Neurite outgrowth inhibitor Nogo-A establishes spatial segregation and extent of  
693 oligodendrocyte myelination. *Proc. Natl. Acad. Sci. U. S. A.* **109**, 1299–304 (2012).
- 694 107. Bechler, M. E., Swire, M. & ffrench-Constant, C. Intrinsic and adaptive myelination—A sequential  
695 mechanism for smart wiring in the brain. *Developmental Neurobiology* (2018). doi:10.1002/dneu.22518
- 696 108. Swire, M. & ffrench-Constant, C. Seeing Is Believing: Myelin Dynamics in the Adult CNS. *Neuron*  
697 (2018). doi:10.1016/j.neuron.2018.05.005
- 698 109. Johansen-Berg, H., Baptista, C. S. & Thomas, A. G. Human Structural Plasticity at Record Speed.  
699 *Neuron* (2012). doi:10.1016/j.neuron.2012.03.001
- 700 110. Sampaio-Baptista, C. & Johansen-Berg, H. White Matter Plasticity in the Adult Brain. *Neuron* **96**,  
701 1239–1251 (2017).
- 702 111. Walhovd, K. B., Johansen-Berg, H. & Káradóttir, R. T. Unraveling the secrets of white matter -  
703 Bridging the gap between cellular, animal and human imaging studies. *Neuroscience* (2014).  
704 doi:10.1016/j.neuroscience.2014.06.058
- 705 112. Fields, R. D. A new mechanism of nervous system plasticity: Activity-dependent myelination. *Nature*  
706 *Reviews Neuroscience* (2015). doi:10.1038/nrn4023

- 707 113. Auer, F., Vagionitis, S. & Czopka, T. Evidence for Myelin Sheath Remodeling in the CNS Revealed by  
708 In Vivo Imaging. *Curr. Biol.* (2018). doi:10.1016/j.cub.2018.01.017
- 709 114. Mitew, S. *et al.* Pharmacogenetic stimulation of neuronal activity increases myelination in an axon-  
710 specific manner. *Nat. Commun.* (2018). doi:10.1038/s41467-017-02719-2
- 711 115. Archer, D. B., Patten, C. & Coombes, S. A. Free-water and free-water corrected fractional anisotropy in  
712 primary and premotor corticospinal tracts in chronic stroke. *Hum. Brain Mapp.* (2017).  
713 doi:10.1002/hbm.23681
- 714 116. Planetta, P. J. *et al.* Free-water imaging in Parkinson's disease and atypical parkinsonism. *Brain* (2016).  
715 doi:10.1093/brain/awv361
- 716 117. Metzler-Baddeley, C., O'Sullivan, M. J., Bells, S., Pasternak, O. & Jones, D. K. How and how not to  
717 correct for CSF-contamination in diffusion MRI. *Neuroimage* (2012).  
718 doi:10.1016/j.neuroimage.2011.08.043
- 719 118. Hoy, A. R., Koay, C. G., Kecskemeti, S. R. & Alexander, A. L. Optimization of a free water elimination  
720 two-compartment model for diffusion tensor imaging. *Neuroimage* (2014).  
721 doi:10.1016/j.neuroimage.2014.09.053
- 722 119. Chung, J. W. *et al.* Parkinson's disease diffusion MRI is not affected by acute antiparkinsonian  
723 medication. *NeuroImage Clin.* (2017). doi:10.1016/j.nicl.2017.02.012
- 724 120. Ofori, E. *et al.* Longitudinal changes in free-water within the substantia nigra of Parkinson's disease.  
725 *Brain* (2015). doi:10.1093/brain/awv136
- 726 121. Stephan, K. E., Tittgemeyer, M., Knösche, T. R., Moran, R. J. & Friston, K. J. Tractography-based  
727 priors for dynamic causal models. *Neuroimage* (2009). doi:10.1016/j.neuroimage.2009.05.096
- 728 122. Dayan, E. & Browner, N. Alterations in striato-thalamo-pallidal intrinsic functional connectivity as a  
729 prodrome of Parkinson's disease. *NeuroImage Clin.* (2017). doi:10.1016/j.nicl.2017.08.003
- 730 123. Mole, J. P. *et al.* Increased fractional anisotropy in the motor tracts of Parkinson's disease suggests  
731 compensatory neuroplasticity or selective neurodegeneration. *Eur. Radiol.* (2016). doi:10.1007/s00330-  
732 015-4178-1
- 733 124. Akram, H. *et al.* l-Dopa responsiveness is associated with distinctive connectivity patterns in advanced  
734 Parkinson's disease. *Mov. Disord.* (2017). doi:10.1002/mds.27017
- 735 125. Herz, D. M. *et al.* Abnormal dopaminergic modulation of striato-cortical networks underlies levodopa-  
736 induced dyskinesias in humans. *Brain* (2015). doi:10.1093/brain/awv096

- 737 126. Ng, B. *et al.* Distinct alterations in Parkinson's medication-state and disease-state connectivity.  
738 *NeuroImage Clin.* (2017). doi:10.1016/j.nicl.2017.09.004
- 739 127. Forstmann, B. U., Isaacs, B. R. & Temel, Y. Ultra High Field MRI-Guided Deep Brain Stimulation.  
740 *Trends Biotechnol.* **35**, (2017).
- 741 128. Isaacs, B. R., Forstmann, B. U., Temel, Y. & Keuken, M. C. The Connectivity Fingerprint of the Human  
742 Frontal Cortex, Subthalamic Nucleus, and Striatum. *Front. Neuroanat.* (2018).  
743 doi:10.3389/fnana.2018.00060
- 744 129. Lorio, S. *et al.* New tissue priors for improved automated classification of subcortical brain structures on  
745 MRI. *Neuroimage* **130**, 157–66 (2016).
- 746 130. Mazziotta, J. C., Toga, A. W., Evans, A. C., Fox, P. & Lancaster, J. A probabilistic atlas of the human  
747 brain: theory and rationale for its development. The International Consortium for Brain Mapping  
748 (ICBM). *NeuroImage* (1995). doi:10.1006/nimg.1995.1012
- 749 131. de Hollander, G. *et al.* A gradual increase of iron toward the medial-inferior tip of the subthalamic  
750 nucleus. *Hum. Brain Mapp.* **35**, 4440–4449 (2014).
- 751 132. Despotović, I., Goossens, B. & Philips, W. MRI Segmentation of the Human Brain: Challenges,  
752 Methods, and Applications. *Comput. Math. Methods Med.* (2015). doi:10.1155/2015/450341
- 753 133. Keuken, M. C., Isaacs, B. R., Trampel, R., van der Zwaag, W. & Forstmann, B. U. Visualizing the  
754 Human Subcortex Using Ultra-high Field Magnetic Resonance Imaging. *Brain Topography* (2018).  
755 doi:10.1007/s10548-018-0638-7
- 756 134. Farhadi, F. *et al.* Sexual dimorphism in Parkinson's disease: Differences in clinical manifestations,  
757 quality of life and psychosocial functioning between males and females. *Neuropsychiatr. Dis. Treat.*  
758 (2017). doi:10.2147/NDT.S124984
- 759 135. Smith, K. M. & Dahodwala, N. Sex differences in Parkinson's disease and other movement disorders.  
760 *Experimental Neurology* (2014). doi:10.1016/j.expneurol.2014.03.010
- 761 136. Augustine, E. F. *et al.* Sex differences in clinical features of early, treated Parkinson's disease. *PLoS*  
762 *One* (2015). doi:10.1371/journal.pone.0133002
- 763 137. Forstmann, B. U. *et al.* Ultra-High 7T MRI of Structural Age-Related Changes of the Subthalamic  
764 Nucleus. *J. Neurosci.* (2013). doi:10.1523/jneurosci.3241-12.2013
- 765 138. Forstmann, B. U., Isaacs, B. R. & Temel, Y. Ultra High Field MRI-Guided Deep Brain Stimulation.  
766 *Trends Biotechnol.* **35**, 904–907 (2017).

- 767 139. Cochrane, C. J. & Ebmeier, K. P. Diffusion tensor imaging in parkinsonian syndromes: A systematic  
768 review and meta-analysis. *Neurology* (2013). doi:10.1212/WNL.0b013e318284070c
- 769 140. Seppi, K. & Poewe, W. Brain Magnetic Resonance Imaging Techniques in the Diagnosis of  
770 Parkinsonian Syndromes. *Neuroimaging Clinics of North America* (2010).  
771 doi:10.1016/j.nic.2009.08.016
- 772 141. Mavridis, I., Boviatsis, E. & Anagnostopoulou, S. Anatomy of the Human Subthalamic Nucleus: A  
773 Combined Morphometric Study. *Anat. Res. Int.* (2013). doi:10.1155/2013/319710
- 774 142. Sharman, M. *et al.* Parkinson's disease patients show reduced cortical-subcortical sensorimotor  
775 connectivity. *Mov. Disord.* **28**, 447–454 (2013).  
776

## 777 **Supporting information**

778 **S1 File: Supporting information** : supplementary materials

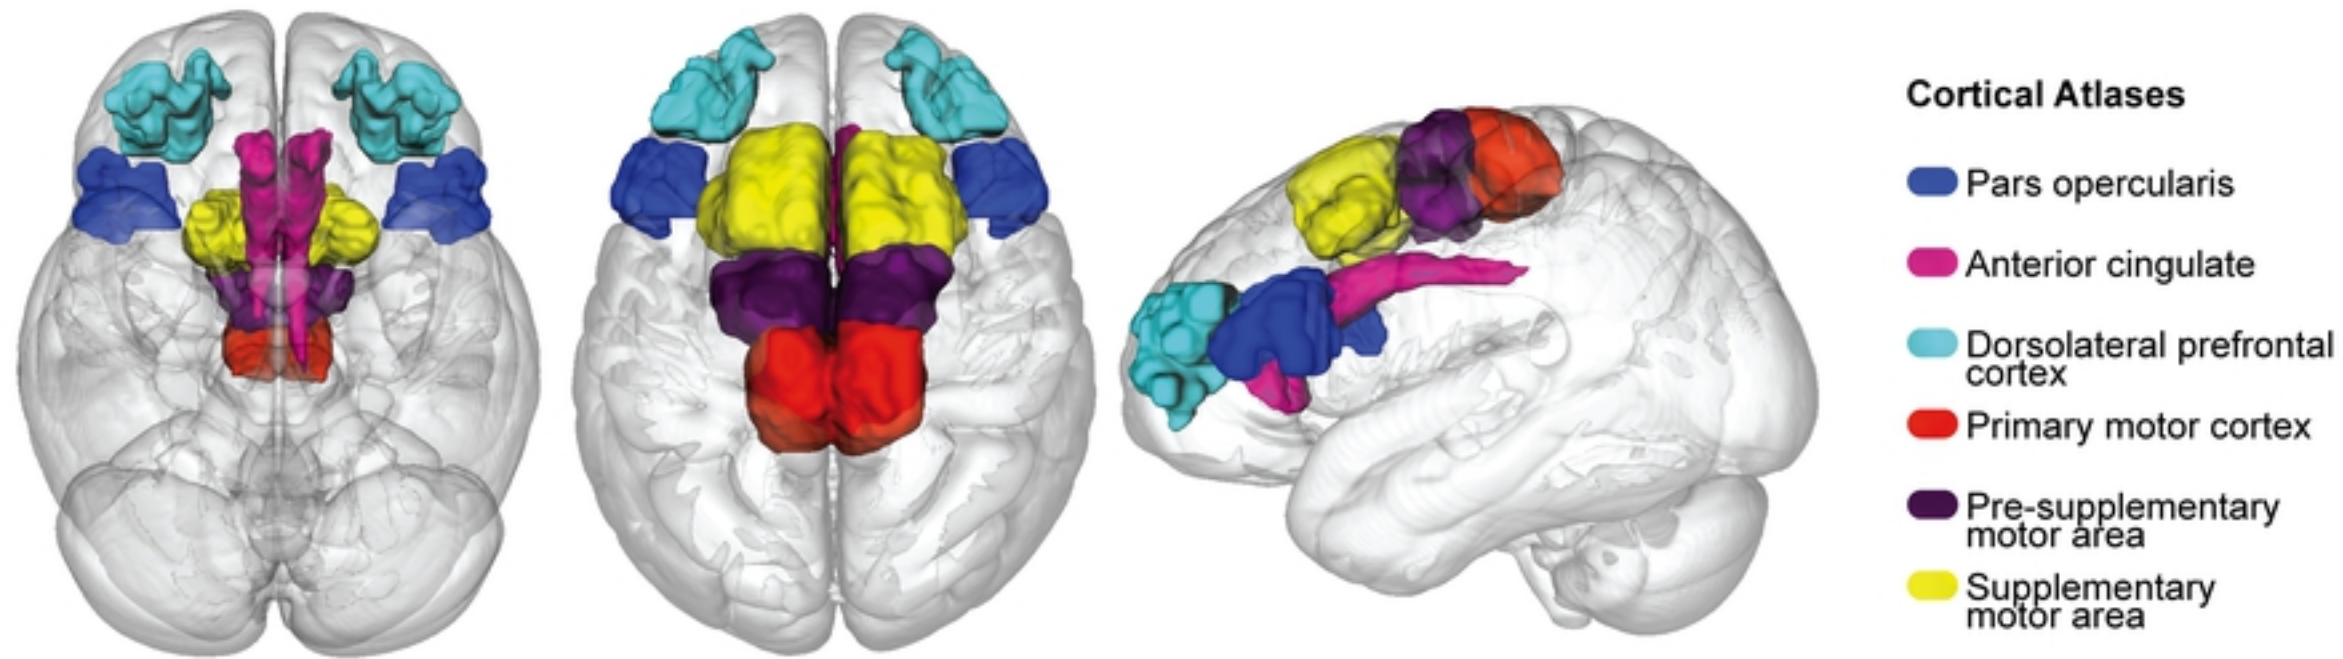

Figure



# STN Atlases

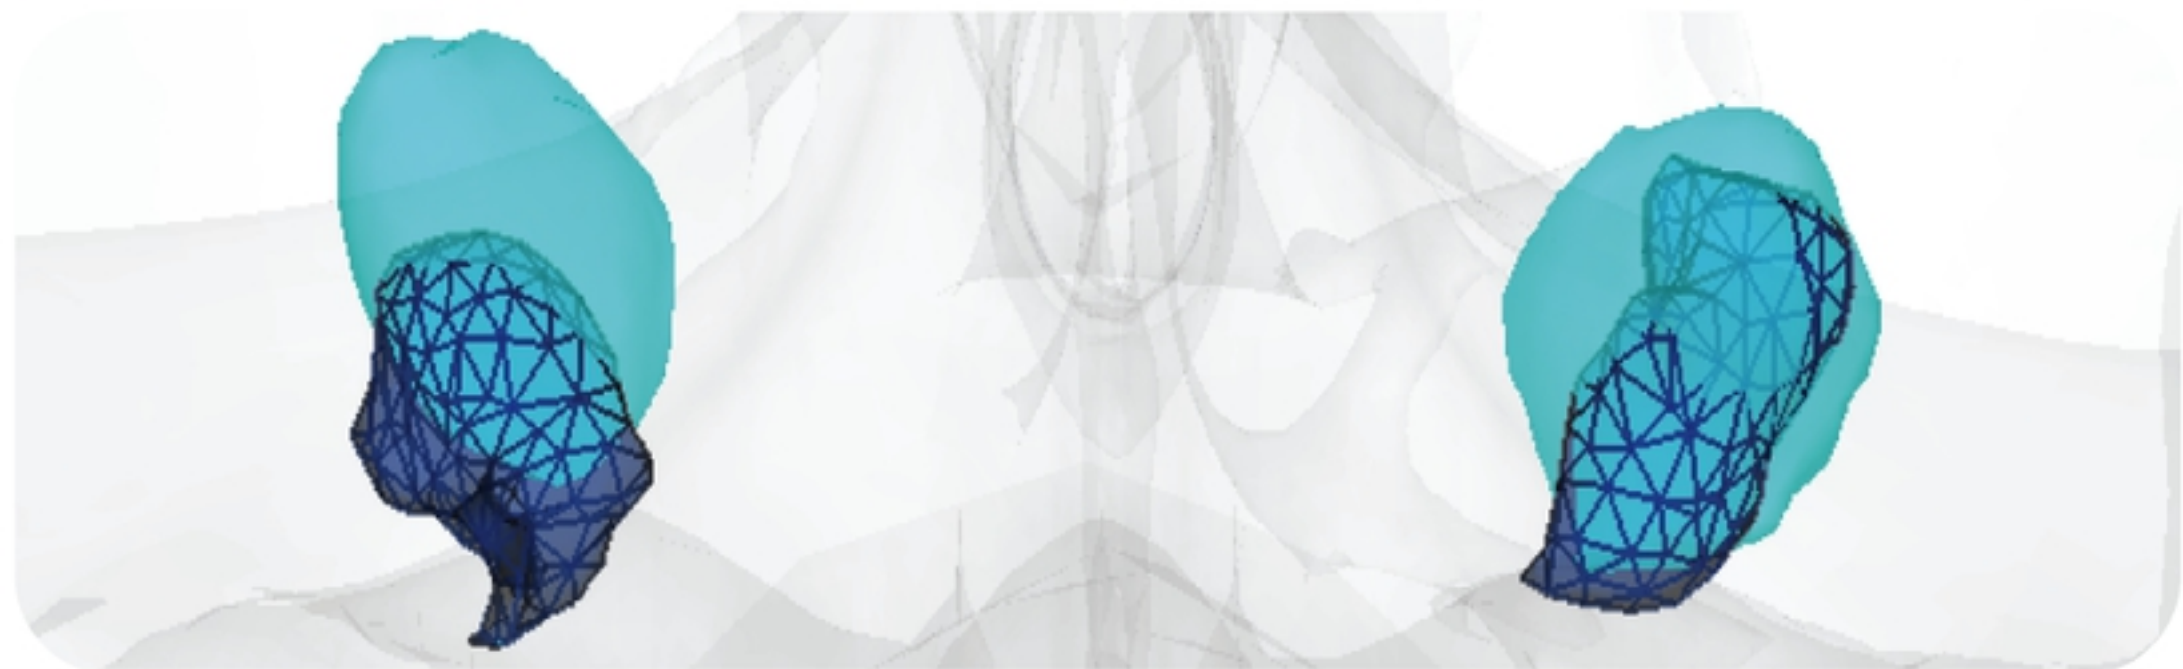

 Parkinson's Disease

 Healthy Controls

### Group specific STN atlases

Parkinsons Disease

Healthy Controls

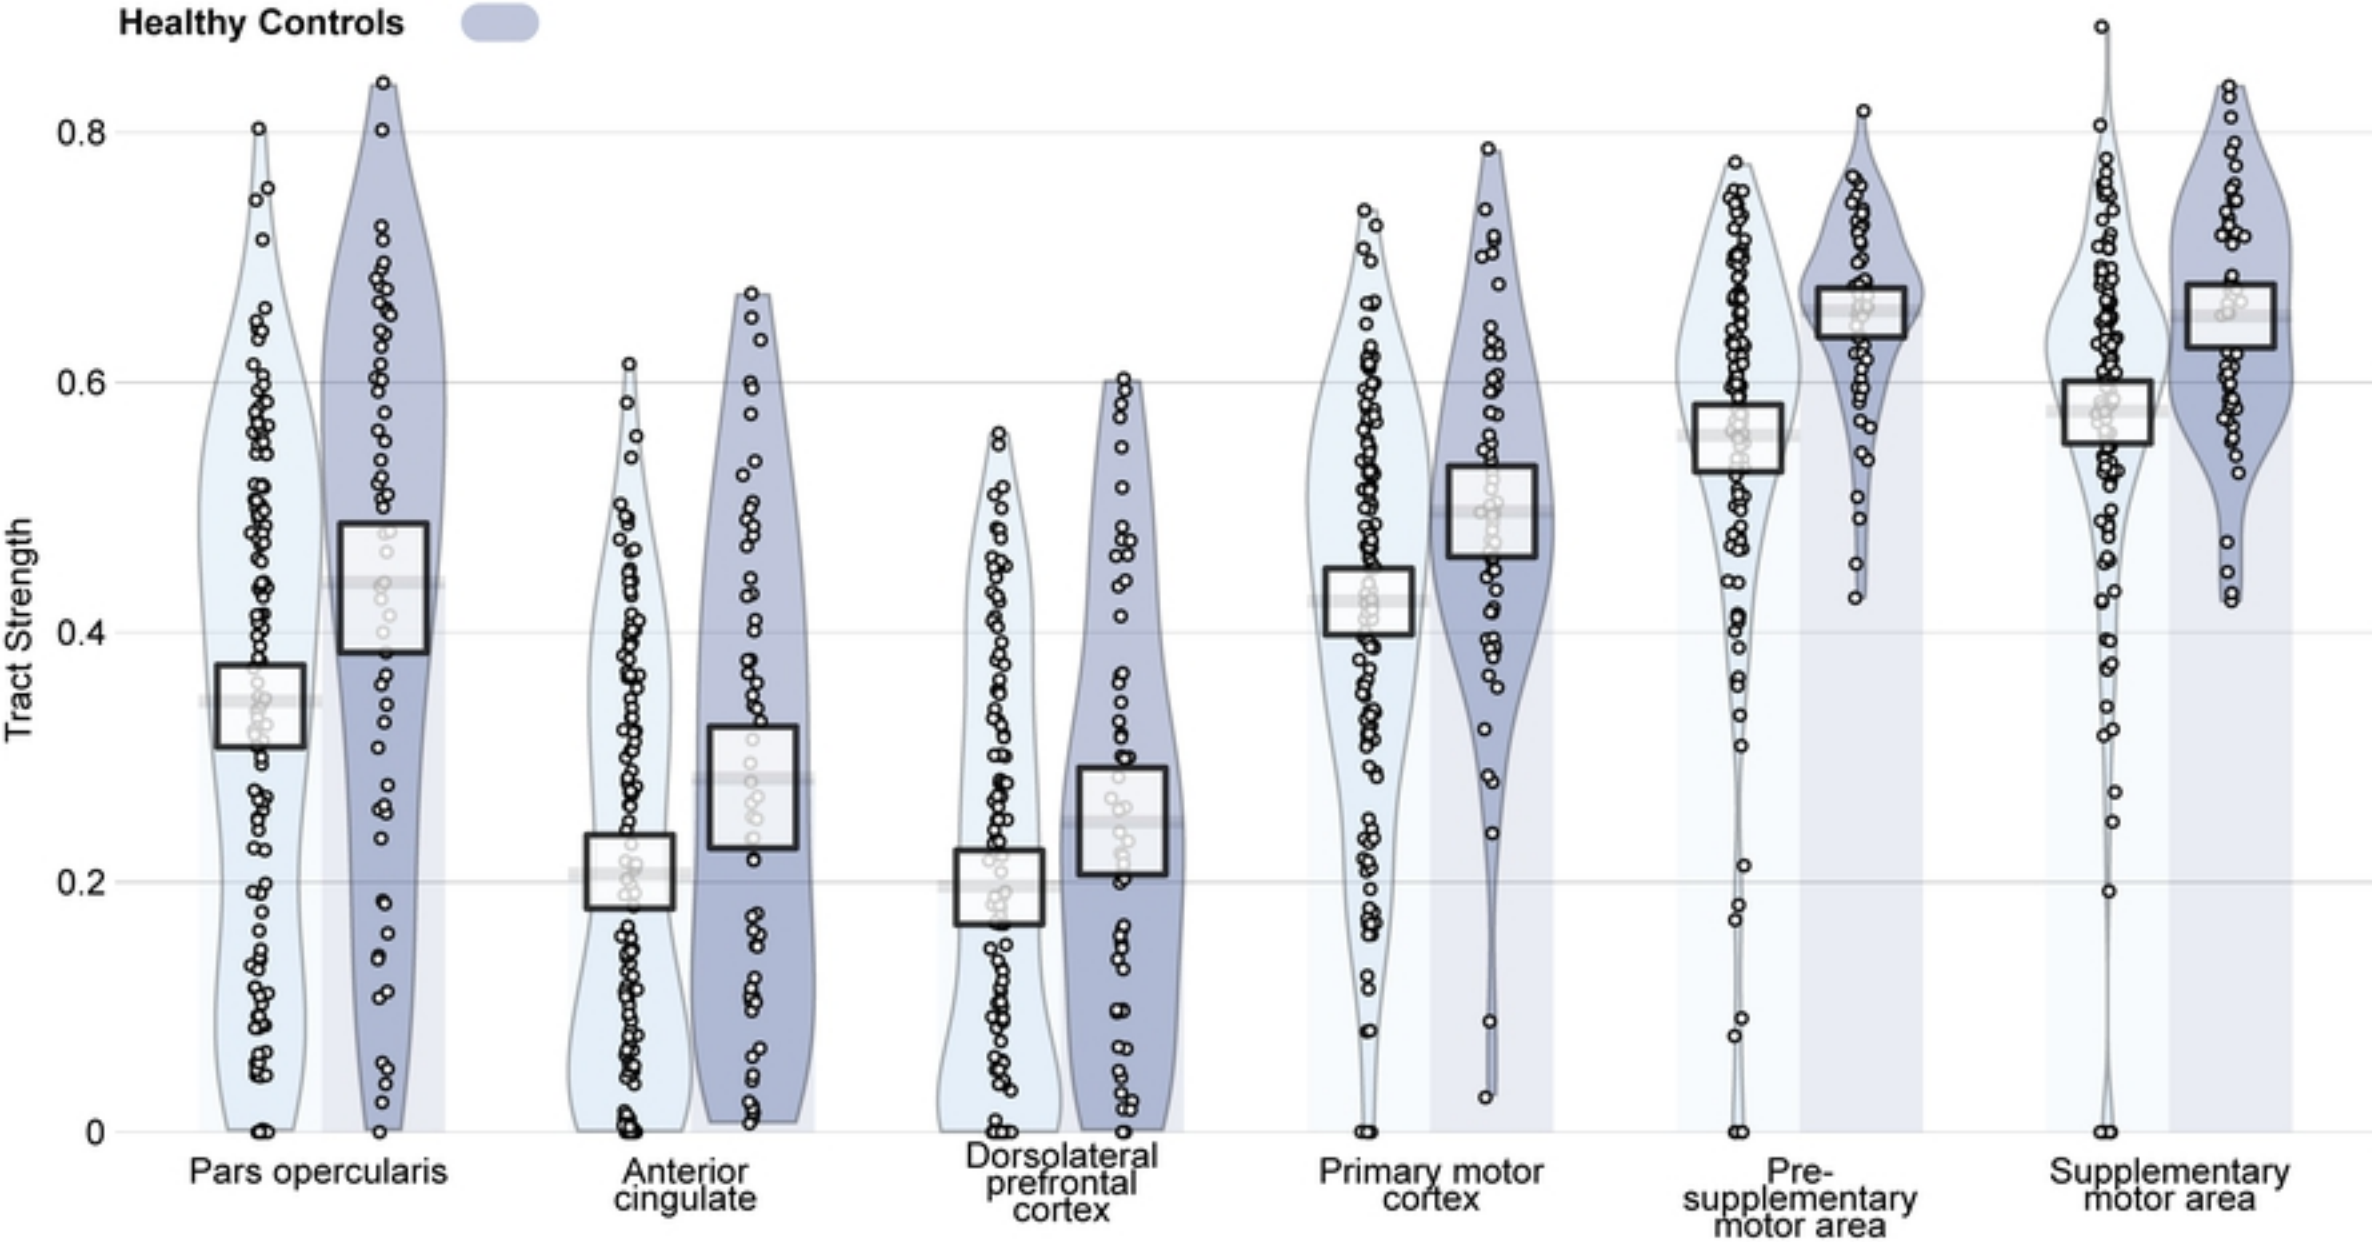

Figure



● Parkinson's Disease  
● Healthy Controls

Fractional Anisotropy Paths

Pars opercularis

Anterior cingulate

Dorsolateral prefrontal cortex

Pre-supplementary motor area

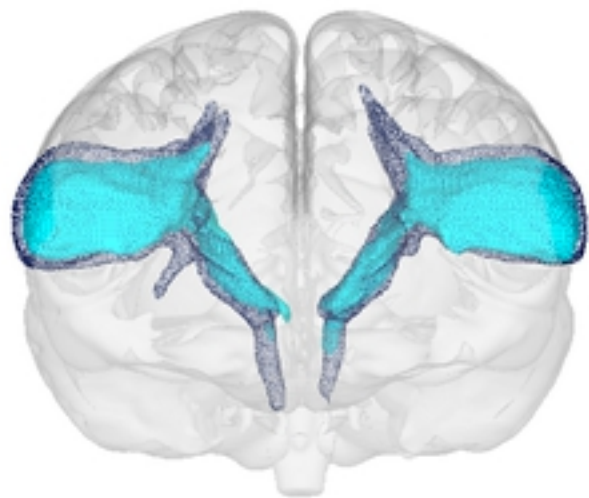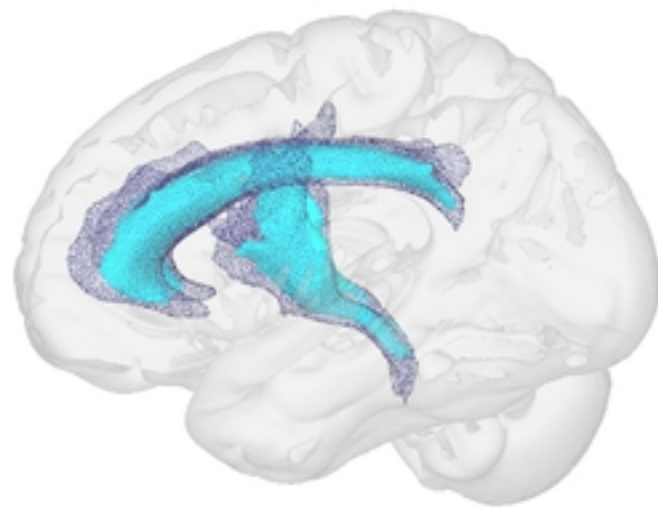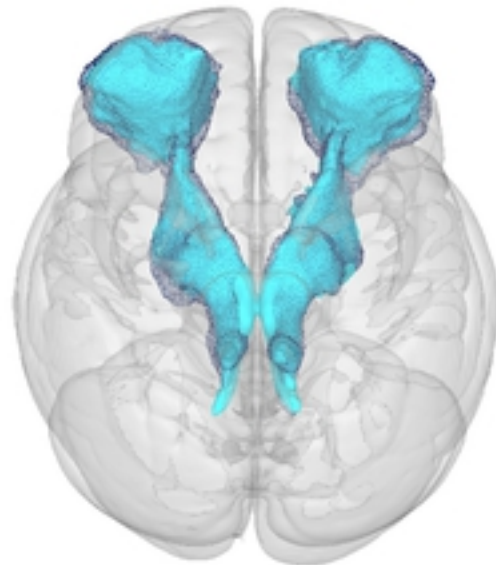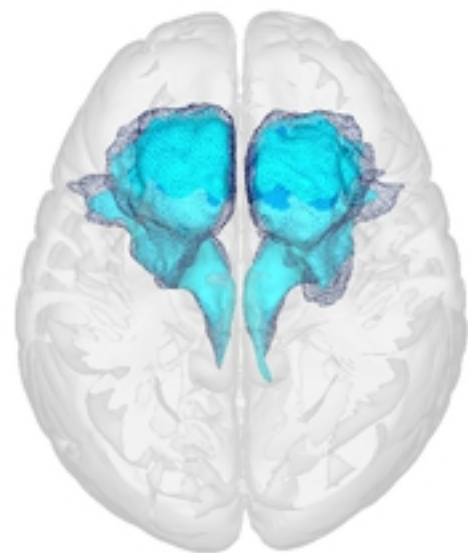

Figure

# STN Atlases

## Control Analysis 1

bioRxiv preprint doi: <https://doi.org/10.1101/576991>; this version posted March 14, 2019. The copyright holder for this preprint (which was not certified by peer review) is the author/funder, who has granted bioRxiv a license to display the preprint in perpetuity. It is made available under aCC-BY 4.0 International license.

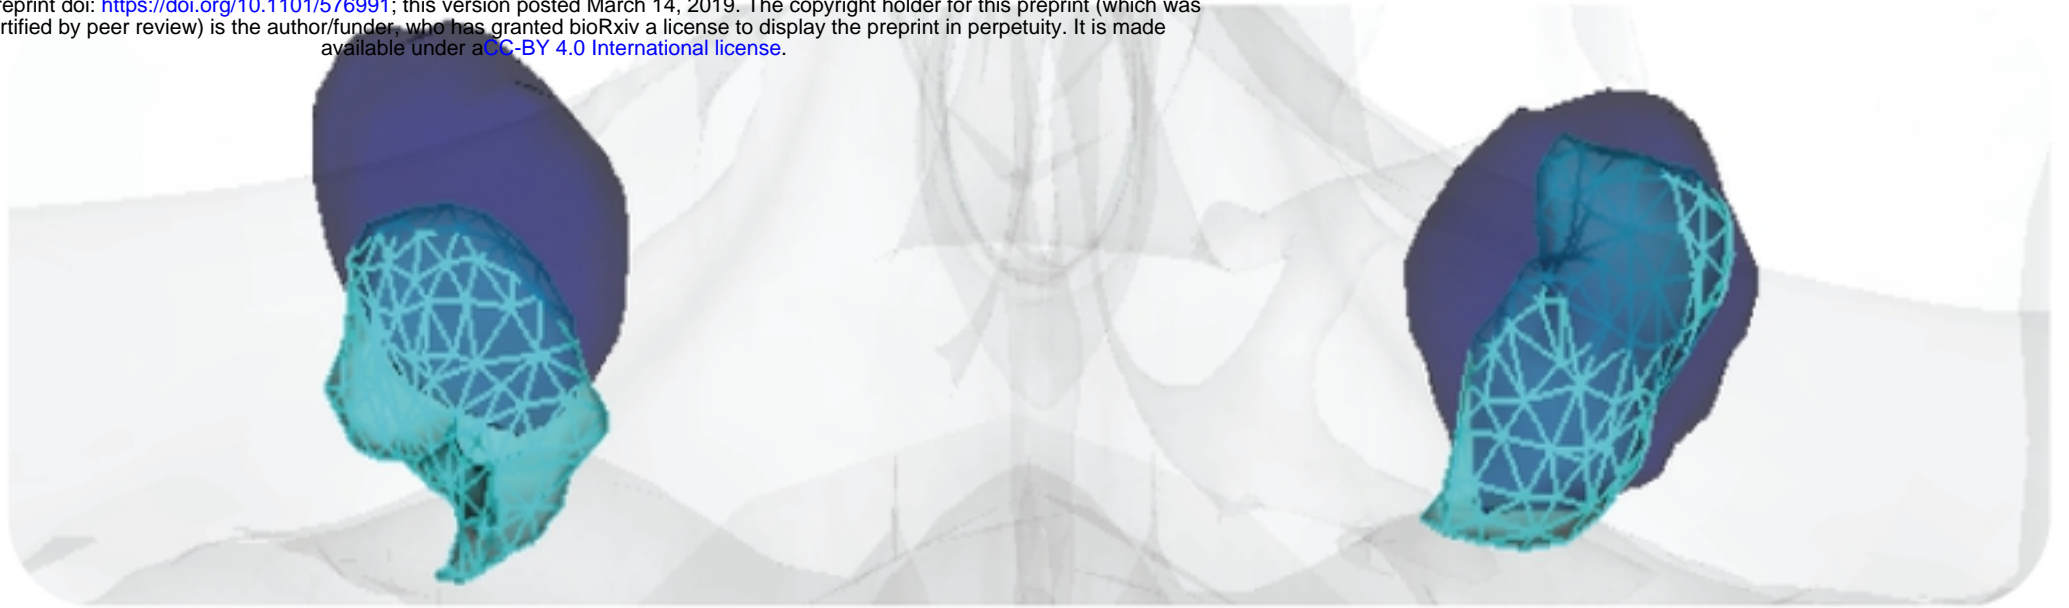

## Control Analysis 2

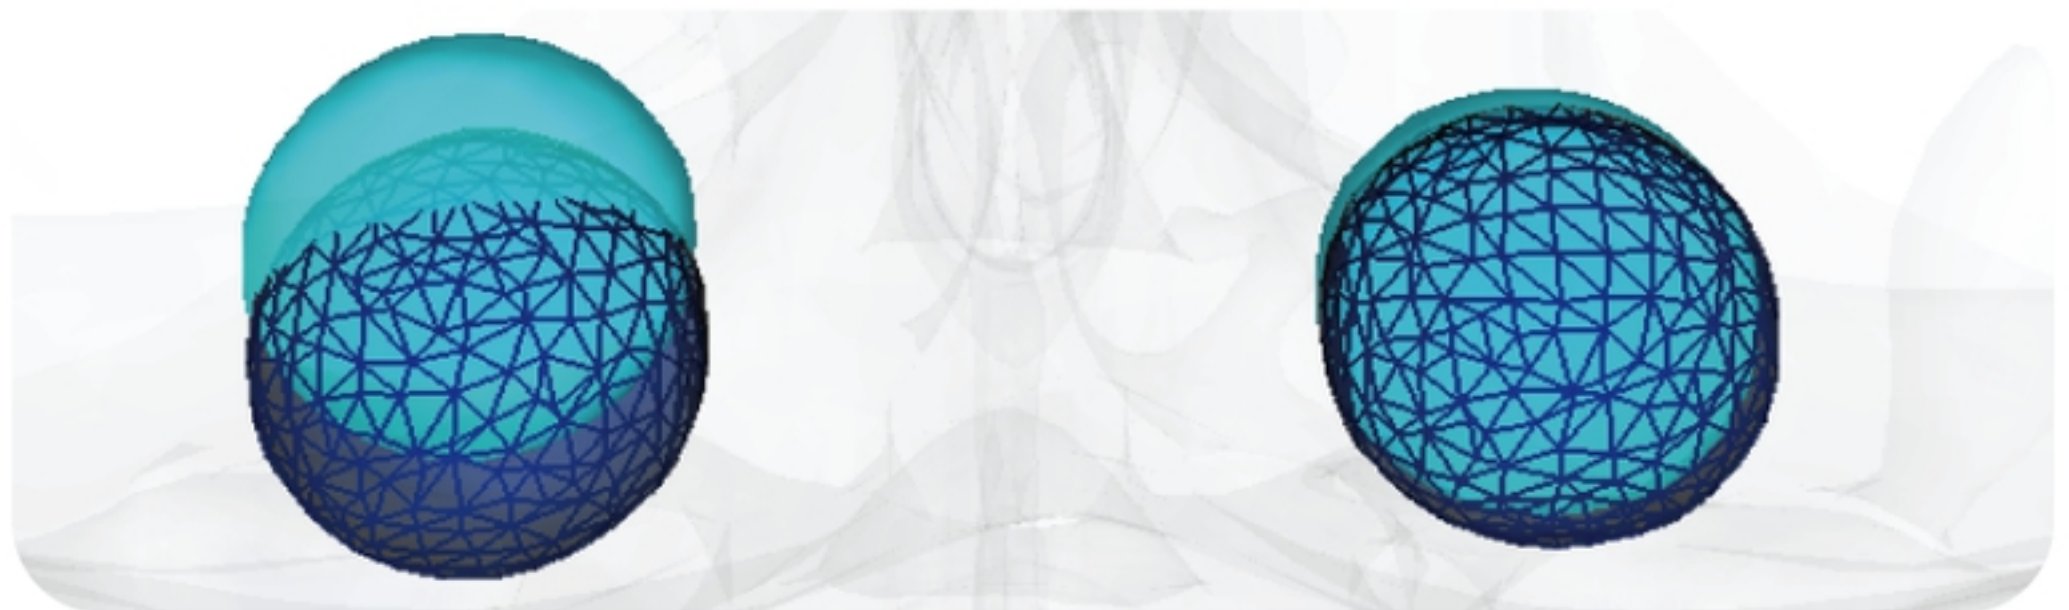

■ Parkinson's Disease

■ Healthy Controls

### Group specific STN atlases

Parkinsons Disease

Healthy Controls

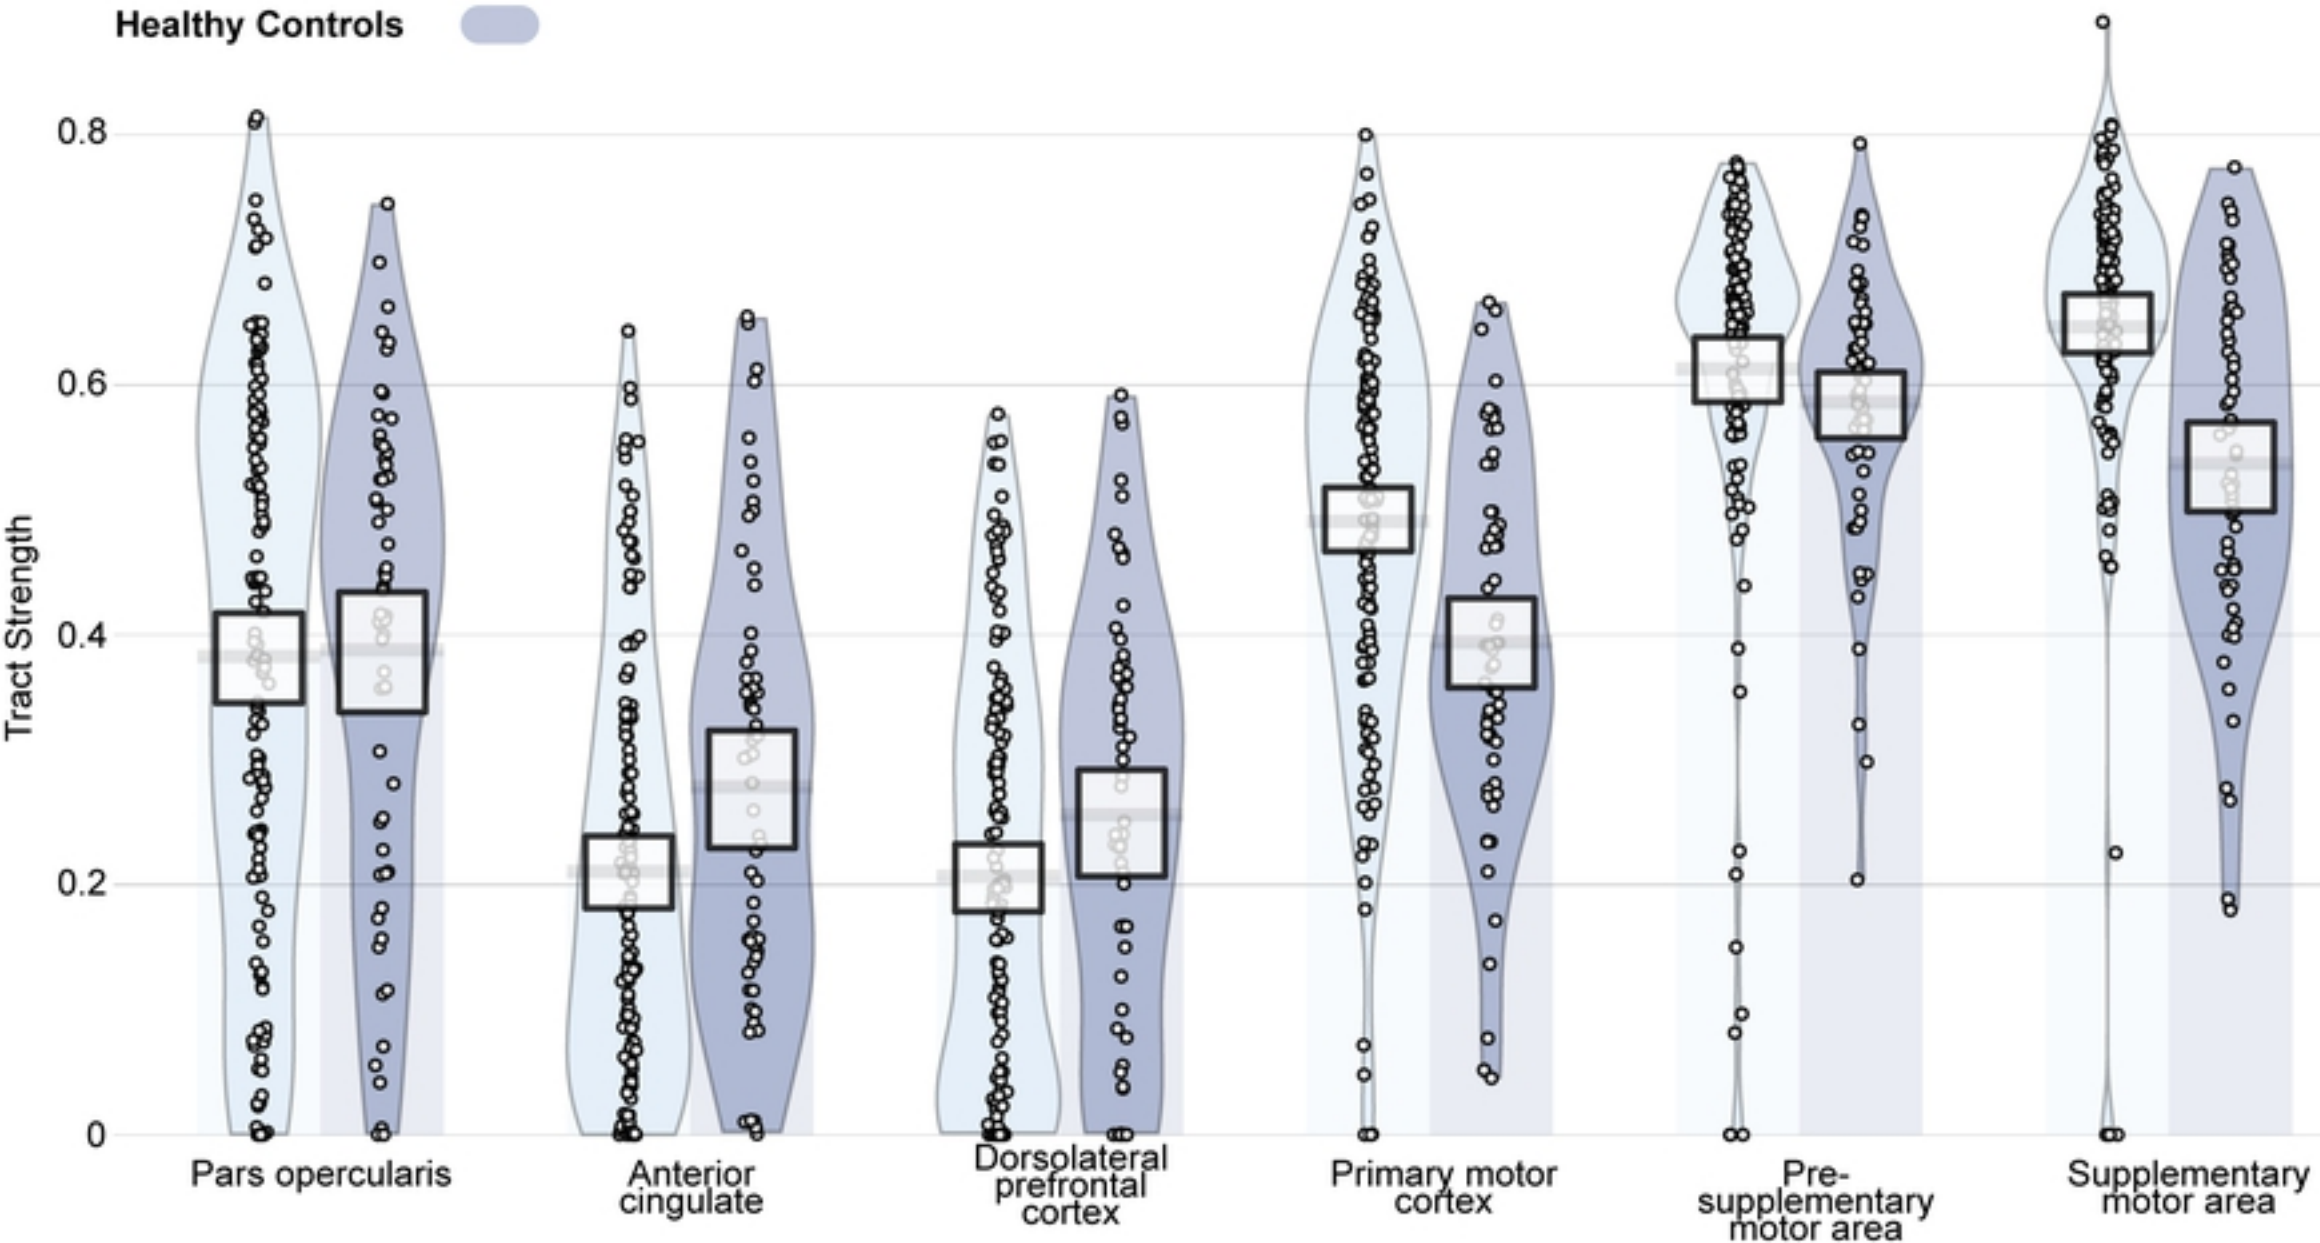

Figure



### Group specific STN atlases

Parkinsons Disease

Healthy Controls

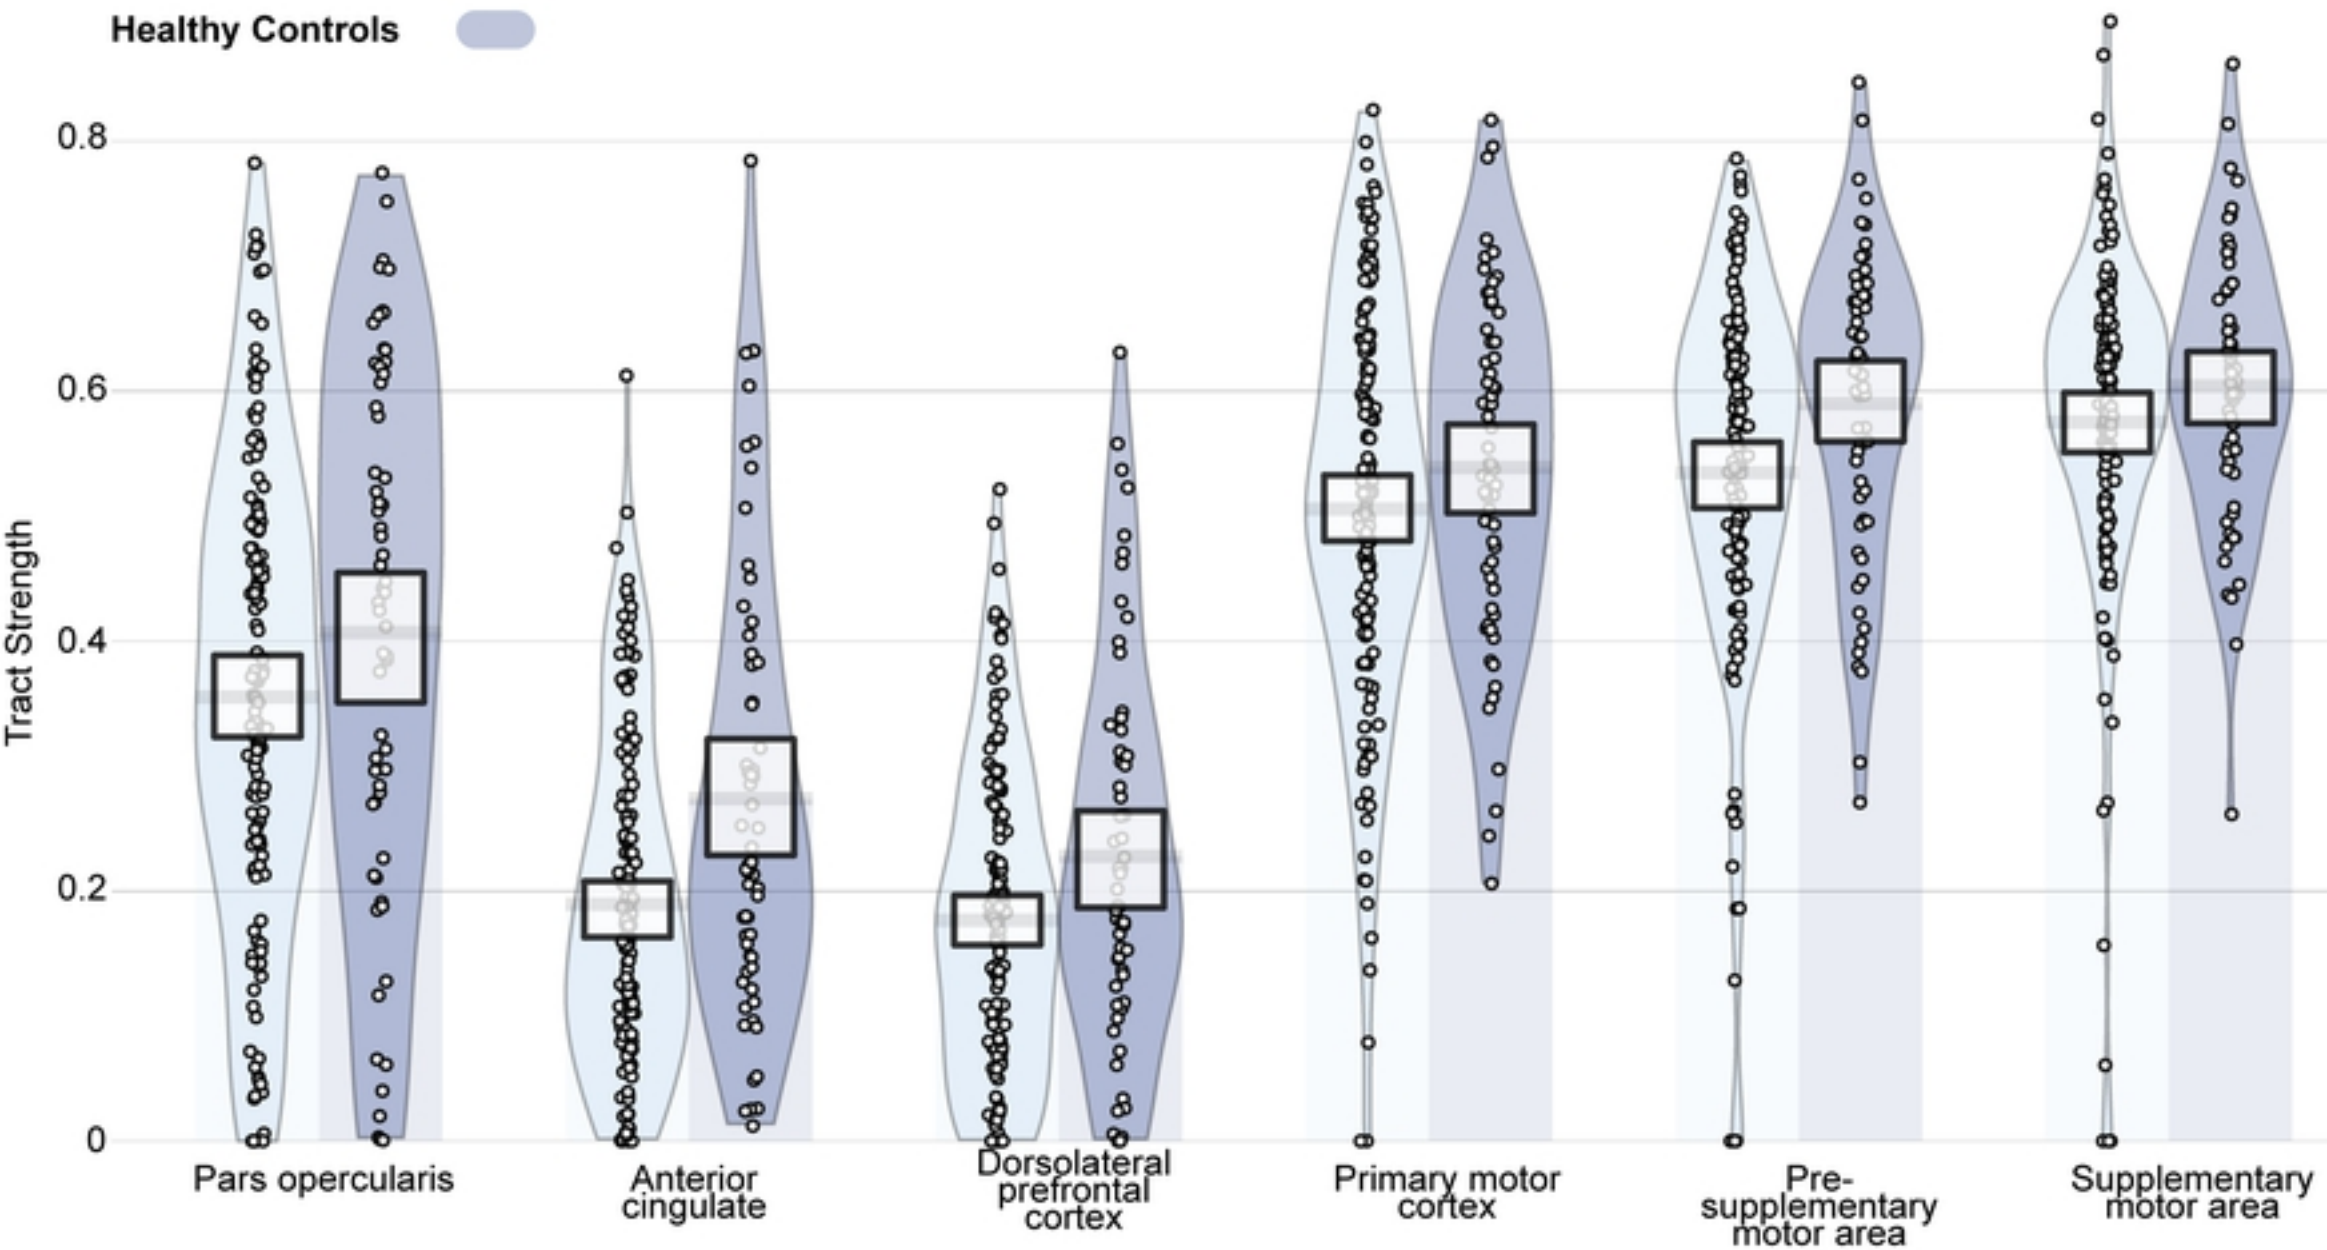

Figure
